# 1 **Trace impurities in test stimuli can seriously compromise chemosensory** 2 **studies**

3  
4 Dirk Louis P. Schorkopf<sup>1,2,§</sup>, Béla Péter Molnár<sup>3</sup>, Marit Solum<sup>1</sup>, Mattias C. Larsson<sup>1</sup>, Jocelyn G. Millar<sup>4</sup>,  
5 Zsolt Kárpáti<sup>3b</sup>, Teun Dekker<sup>1, § b</sup>

6 <sup>§</sup>Corresponding authors: Dirk.Louis.Research@outlook.com, teun.dekker@slu.se

7 <sup>1</sup>Department of Plant Protection Biology, Division of Chemical Ecology, Swedish University of Agricultural  
8 Sciences, Alnarp, Sweden

9 <sup>2</sup>Sørengkaia 115, 0194 Oslo, Norway

10 <sup>3</sup>Zoology Department, Plant Protection Institute, Centre for Agricultural Research, Hungarian Academy of Sciences,  
11 Budapest, Hungary

12 <sup>4</sup>Departments of Entomology and Chemistry, University of California, Riverside CA 92521, USA

13 <sup>b</sup> shared last authorship

14

15 **Keywords:** chemosensation, olfaction, chemoreceptor, purity, *Drosophila*, sensitivity, *Bombyx mori*

16

17 **The discovery of olfactory receptors and major technological advances have greatly accelerated our**  
18 **understanding of chemosensory mechanisms. However, some of this rapid progress may be**  
19 **compromised by inadequate knowledge or characterization of the purity of chemical stimuli used to**  
20 **challenge olfactory or other chemoreceptors when mapping their response profiles. Here, we provide**  
21 **strong evidence that the presence of trace impurities in test stimuli can completely obscure true**  
22 **ligand-receptor relationships. DmOR7a, an olfactory receptor of the vinegar fly (*Drosophila***  
23 ***melanogaster*) has been reported to respond to several long-chain aliphatic ligands such as a putative**  
24 ***Drosophila* pheromone<sup>1</sup>, the pheromone of the silkworm moth *Bombyx mori*<sup>2</sup>, and a common fatty**  
25 **acid, linoleic acid<sup>3</sup>. By contrast, we show that DmOR7a responds with high sensitivity to volatile**  
26 **impurities and degradation products present in minute quantities in authentic standards of those**

27 **compounds, but not to the standards themselves. Responses to impurities can easily go unnoticed due**  
28 **to two main factors. First, the sensitivity of receptors to key ligands may be greater than that of**  
29 **analytical chemistry instruments used to check sample purity. Second, the concentration of highly**  
30 **volatile impurities in an odour puff may be orders of magnitude higher than the main component of**  
31 **a sample, due to the large differences in vapour pressures between the impurities and the main**  
32 **component. Issues concerning impurities are not limited to studies on olfaction that use odour puffs**  
33 **to characterize receptor-ligand interactions, but may affect all studies on chemosensation, from**  
34 **molecular biology and in-silico predictions to behaviour. Purity, which is crucial in receptor-ligand**  
35 **studies, is always implied, but rarely checked rigorously. To avoid misinterpretations, a proper**  
36 **account of all compounds present in test stimuli and an unequivocal confirmation of ligand affinity**  
37 **should accompany chemosensory studies.**

38 The field of chemosensory sciences has progressed rapidly through molecular, genetic, and  
39 neurophysiological advances that permit the unravelling of the full sequence from perireceptor events to  
40 receptor-induced intracellular responses, downstream neuronal signalling and processing in the brain, and  
41 ultimately behavioural output<sup>4-8</sup>. A commonplace assumption in these studies is that standards used as  
42 chemosensory stimuli are pure, or alternatively, that observed responses are the result of interactions  
43 between the receptor and the nominal authentic standard.

44

45 In routine evaluations of *D. melanogaster* olfactory receptor (OR) affinities, we observed that AB4a  
46 neurons housed in antennal basiconic sensilla responded differently than anticipated. This neuron and its  
47 endogenous receptor DmOR7a are reported to be broadly sensitive to short-chain six-carbon aldehydes,  
48 alcohols, and esters<sup>9</sup>, but also to longer chain compounds, such as the silk moth pheromone, bombykol  
49 ((10*E*,12*Z*)-10,12-hexadecadien-1-ol)<sup>2,10</sup>, the *Drosophila* cuticular hydrocarbon, (*Z*)-9-tricosene (Z9T)<sup>1</sup>,  
50 and linoleic acid (LLA)<sup>3</sup>. We found that cartridges loaded with synthetic bombykol, Z9T, or LLA quickly

51 lost activity with repeated puffs (Extended Data Fig. 1c, and Extended Data Fig. 2c). This was unexpected,  
52 because these long-chain compounds have low vapour pressures and would be expected to deliver a  
53 relatively constant stimulus dose over numerous puff cycles<sup>11-13</sup>. Indeed, such declines were not observed  
54 (Extended Data Fig. 1a,b) when using the same protocol to stimulate the pheromone receptor of *B. mori*,  
55 BmOR1<sup>14</sup> (exogenously expressed in *D. melanogaster* T1 neurons, T1<sub>BmOR1</sub>) with bombykol, or when  
56 stimulating wildtype T1 neurons (expressing its cognate receptor DmOR67d<sup>15</sup>) with its ligand, the long-  
57 chain *Drosophila* pheromone *cis*-vaccenyl acetate ((*Z*)-11-octadecenyl acetate; *cVA*).

58 Furthermore, AB4a neurons responded equally well to bombykol on a filter paper or in paraffin oil<sup>11</sup>  
59 (Extended Data Fig. 3a). This was counterintuitive, because non-volatile paraffin oil should retain  
60 bombykol, a long-chain aliphatic compound, and significantly reduce volatilization and hence stimulus  
61 intensity compared to bombykol applied to filter paper<sup>11,13</sup>. Indeed, responses of antennal trichoid T1  
62 (sensitive to *cVA*) and T1<sub>BmOR1</sub> neurons (sensitive to bombykol) were significantly attenuated when  
63 stimulated with air puffed over dilutions of *cVA* or bombykol dissolved in paraffin oil versus on filter paper  
64 (Extended Data Fig. 3b, c).

65 This cast doubt on whether the above-mentioned compounds were indeed ligands for AB4a neurons. To  
66 more rigorously test this, we used coupled gas chromatography-electroantennographic detection (GC-  
67 EAD), which separates the injected sample into its individual components and sequentially passes these  
68 over the antennal preparation. Thus, each antennal response can be unequivocally attributed to a defined  
69 peak, which generally represents a single pure compound. We found that the cleanly separated bombykol  
70 peak did not induce antennal depolarization in wildtype fly antennae (Fig. 1a; Extended Data Fig. 4 and 5),  
71 nor did bombykal (another reported ligand for AB4a neurons)<sup>2,10</sup>, Z9T, or LLA (Fig. 1b, Extended Data  
72 Fig. 5). The GC-EAD setup was clearly functioning properly because antennae of male *B. mori* responded  
73 strongly to bombykol (Fig. 1c), as did antennae of *D. melanogaster* expressing the bombykol receptor  
74 BmOR1 in T1 neurons (Fig. 1a). Wildtype fly antennae also responded as expected to *cVA* (Fig. 1,  
75 Extended Data Fig. 4).

76

77 Whereas bombykol did not elicit responses from wildtype antennae, responses were elicited by several  
78 impurities that eluted much earlier than bombykol (Fig. 1, R1 and R2). Using coupled GC-single-sensillum  
79 recordings (GC-SSR), we challenged AB4 sensillum preparations sequentially with these impurities. The  
80 above two low-molecular-weight impurities (R1 and R2) in the bombykol and bombykal samples induced  
81 strong responses in AB4a neurons (Fig. 2a). Coupled GC-mass spectrometry subsequently identified these  
82 as (*E*)-2-hexenal (E2H) and (*Z*)-2-hexenal (Z2H). E2H is a known ligand for AB4a neurons and their  
83 cognate receptor DmOR7a<sup>9</sup>. Puffs from cartridges loaded with 2-hexenal in amounts corresponding to those  
84 in our bombykol sample induced antennal responses comparable to those seen with our bombykol sample  
85 (Fig. 2b). We further tested the role of 2-hexenal by removing E2H and Z2H from the sample, predicting  
86 that this would significantly reduce the responses of AB4a neurons. Thus, reduction of the sample with  
87 sodium borohydride, which reduces E2H and Z2H to the far less stimulatory<sup>9</sup> alcohols (*E*)- and (*Z*)-2-  
88 hexenol, dramatically attenuated the responses of AB4a neurons, as did reduction of synthetic E2H itself  
89 (Fig. 3a, b). E2H may arise from oxidative degradation of bombykol and bombykal at carbon 10, similar to  
90 oxidative degradation of unsaturated fatty acids<sup>16</sup>. Interestingly, a freshly synthesized batch of bombykol  
91 obtained from the same company contained significantly less E2H than the original sample, and accordingly  
92 induced lower responses from AB4a neurons (Extended Data Fig. 2c, 6).

93 We subsequently assessed whether samples of LLA and Z9T also contained E2H or other AB4a-stimulating  
94 impurities. Indeed, GC-SSR analyses of LLA and Z9T samples showed responses from AB4a neurons at  
95 the retention time of E2H (Extended Data Fig. 7), although weaker than bombykol, likely due to the  
96 substantially lower amounts of E2H in the samples (Extended Data Figs. 8). Similar to bombykol, Z9T  
97 samples from two different suppliers elicited markedly different response amplitudes from AB4a neurons  
98 (Extended Data Fig. 2a,b), suggesting that impurities, rather than Z9T itself, induced the responses. This is  
99 underscored by the fact that AB4a neurons responded more strongly to puffs of synthetic (*Z*)-7-tricosene  
100 (Z7T) than Z9T (Extended Data Fig. 2a), likely because this sample contained ~10-fold more E2H than

101 either of the Z9T samples. Z7T is a male cuticular pheromone of *D. melanogaster*<sup>17,18</sup> and present in much  
102 higher amounts than Z9T<sup>18</sup>, but was excluded in the electrophysiological evaluations of the above-  
103 mentioned study<sup>1</sup>. Finally, we assessed whether AB4a neurons responded to biological samples containing  
104 Z9T: odour puffs from a cartridge loaded with a cuticular extract from 350 (mixed sex) or 70 *Drosophila*  
105 (separated sexes) containing up to ~15 µg of Z9T, did not elicit significant responses (Extended Data Fig.  
106 9). None of the above observations fit with a Z9T-mediated role for AB4a neurons in aggregation and  
107 oviposition<sup>1</sup>, but instead show that AB4a neurons respond to impurities in synthetic Z9T samples, rather  
108 than to Z9T itself.

109 In the above analyses, each of the synthetic samples contained approximately 5% impurities constituting  
110 numerous tiny peaks (e.g. Fig. 1, Fig. 4), and sensory neurons appeared extraordinarily sensitive to some  
111 of these trace impurities, even when below the GC detection threshold (~ 1 picogram<sup>11,13</sup>). Thus, standard  
112 GC analysis may not suffice for detection of confounding impurities in samples.

113 The problem may be compounded when samples are puffed over antennal preparations. During  
114 puffing, the transition of compounds from the liquid to the vapour phase is largely dependent on their  
115 vapour pressures<sup>11,13</sup>. Accordingly, the relative proportions of compounds in the vapour may be massively  
116 different than their proportions in the liquid phase. For example, because the calculated vapour pressure of  
117 E2H at 25°C is 629 Pa, versus  $7.59 \times 10^{-4}$  Pa for bombykol (Supplementary Table 5, Extended Data Fig.  
118 10<sup>19</sup>), the headspace above a sample of bombykol containing 0.1% E2H would contain far more E2H than  
119 bombykol. Consequently, the composition of the bulk sample may be entirely unrepresentative of the  
120 composition of the headspace used for stimulation. Indeed, the headspace of bombykol, Z9T, LLA and  
121 cVA, sampled with Solid Phase Microextraction (SPME)<sup>20</sup>, was dominated by numerous volatile impurities  
122 (Fig. 4, Extended Data and Supplementary Tables 1-4), whereas the main compound was barely detectable.  
123 Many impurities in the headspace of samples elicited consistent EAD responses (Fig. 4, Extended Data  
124 Tables 1-4), among which were several ligands for receptors other than DmOR7a<sup>9</sup>.

125 It is common practice in chemoreceptor studies to prepare panels of chemical species at fixed amounts or  
126 concentrations so to assign ligands to receptors, sensory neurons, processing networks and behaviour<sup>9,11</sup>. In  
127 addition to the potentially confounding impurities present in synthetic standards, we emphasize that the  
128 precise amount and ratio of molecules reaching the target might vastly differ from the prepared/intended  
129 amount<sup>11</sup> if factors such as different vapour pressures or solubility are neglected.

130 Importantly, impurities can affect chemosensory studies even when a compound has been unequivocally  
131 linked to a target neuron. For instance, in our study, all the synthetic samples contained impurities that  
132 induced responses in sensory neuron types other than AB4a neurons (see Fig. 4a and Extended Tables 1-  
133 4<sup>9</sup>). The above samples thus stimulated non-target sensory neurons with unknown effects on downstream  
134 neural integration and behavioural output<sup>21</sup>.

135 In the present study, a single neuron-receptor combination, AB4a-DmOR7a, served to illustrate how the  
136 extraordinary sensitivity of receptors to their key ligands, vast differences in vapour pressures between a  
137 putative test chemical and its impurities, or a combination thereof<sup>11,22-24</sup> can skew or even completely  
138 confound the results of otherwise elegantly crafted studies. This issue of impurities is ubiquitous and  
139 pernicious, potentially affecting any study involving chemoreceptors and sensory neurons, and the correct  
140 interpretation of downstream neuronal outputs, signal integration in the brain, and finally behavioural  
141 responses. To minimize errors due to impurities and more reliably correlate ligands with their receptors,  
142 neural circuits and behaviour, we advocate using methods such as GC-EAD or GC-SSR which separate out  
143 impurities and deliver known amounts of pure ligands to their targets.

144

145

146 **Acknowledgements**

147 We thank Prof. W. Francke for comments during data collection and writing, Prof. Walter Leal for BmOR1  
148 *Drosophila* lines, and Prof. Barry Dickson for the DmOR67D-Gal4 *Drosophila* line. The research was  
149 supported by the following grants: ICE<sup>3</sup> (a Linnaeus grant to the unit of Chemical Ecology, DLPS, MS,  
150 MCL, TD), Vetenskapsrådet (621-2014-4816, TD), TASENE (a grant for research collaboration with  
151 Tanzania, Tasene/Sida/2/2012, DLPS), Carl-Fredrik von Horns fund of the Royal Swedish Academy of  
152 Agriculture and Forestry (H11-0195-CFH-01, DLPS), Guest Scientists Fellowship Programme of the  
153 Hungarian Academy of Sciences (VK-003/2016, TD, ZK), Hungarian Scientific Research Fund - NKFIH  
154 (K 119844, ZK, BPM), National Research, Development, and Innovation Office (GINOP-2.3.2-15-2016-  
155 00051, ZK, BPM).

156 **Author Contributions** Conceived the original idea of the significance of impurities in chemosensory  
157 studies (TD), initiated, conceptualized and coordinated the research (DLPS, TD), designed the experiments  
158 (DLPS, MS, MCL, BPM, ZK, TD), executed the experiments (DLPS, MS, MCL, BPM, JM, ZK, TD),  
159 analyzed chemical data and identified impurities (DLPS, BPM, JM), analyzed physiological data (DLPS,  
160 BPM, ZK, TD), performed statistics (DLPS), wrote initial versions of the manuscript (DLPS, TD),  
161 commented and improved the manuscript (DLPS, MS, MCL, BM, JM, ZK, TD).

162 **Competing interests** The authors declare no competing interests.

163 **Extended data** is available. [to be filled in after acceptance for publication]

164 **Supplementary information** is available. [to be filled in after acceptance for publication]

165 **Reprints and permissions information** [to be filled in after acceptance for publication]

166 **REFERENCES**

167

- 168 1. Lin, C. C., Prokop-Prigge, K. A., Preti, G. & Potter, C. J. Food odors trigger *Drosophila* males  
169 to deposit a pheromone that guides aggregation and female oviposition decisions. *Elife* **4**,  
170 e08688 (2015).
- 171 2. Syed, Z., Ishida, Y., Taylor, K., Kimbrell, D. A. & Leal, W. S. Pheromone reception in fruit  
172 flies expressing a moth's odorant receptor. *Proc. Natl. Acad. Sci.* **103**, 16538–16543 (2006).
- 173 3. Hallem, E. A. & Carlson, J. R. Coding of odors by a receptor repertoire. *Cell* **125**, 143–160  
174 (2006).
- 175 4. Hansson, B. S. & Stensmyr, M. C. Evolution of insect olfaction. *Neuron* **72**, 698–711 (2011).
- 176 5. Leal, W. S. Odorant reception in insects: roles of receptors, binding proteins, and degrading  
177 enzymes. *Annu. Rev. Entomol.* **58**, 373–391 (2013).
- 178 6. Depetris-Chauvin, A., Galagovsky, D. & Grosjean, Y. Chemicals and chemoreceptors:  
179 ecologically relevant signals driving behavior in *Drosophila*. *Front. Ecol. Evol.* **3**, (2015).
- 180 7. Mansourian, S. & Stensmyr, M.C. The chemical ecology of the fly. *Curr. Opin. Neurobiol.* **34**,  
181 95–102 (2015).
- 182 8. Grabe, V. et al. Elucidating the neuronal architecture of olfactory glomeruli in the *Drosophila*  
183 antennal lobe. *Cell Rep.* **16**, 3401–3413 (2016).
- 184 9. Münch, D. & Galizia, C. G. DoOR 2.0 - Comprehensive mapping of *Drosophila melanogaster*  
185 odorant responses. *Sci. Rep.* **6**, 21841 (2016).
- 186 10. Syed, Z., Kopp, A., Kimbrell, D. A. & Leal, W. S. Bombykol receptors in the silkworm moth  
187 and the fruit fly. *Proc. Natl. Acad. Sci.* **107**, 9436–9439 (2010).
- 188 11. Andersson, M. N., Schlyter, F., Hill, S. R. & Dekker, T. What reaches the antenna? How to  
189 calibrate odor flux and ligand-receptor affinities. *Chem. Senses* **37**, 403–420 (2012).



- 190 12. Kárpáti, Z., Tasin, M., Cardé, R. T. & Dekker, T. Early quality assessment lessens pheromone  
191 specificity in a moth. *Proc. Natl. Acad. Sci.* **110**, 7377–7382 (2013).
- 192 13. Tasin, M., Cappellin, L. & Biasioli, F. Fast direct injection mass-spectrometric  
193 characterization of stimuli for insect electrophysiology by proton transfer reaction-time of  
194 flight mass-spectrometry (PTR-ToF-MS). *Sensors* **12**, 4091–4104 (2012).
- 195 14. Nakagawa, T., Sakurai, T., Nishioka, T. & Touhara, K. Insect sex-pheromone signals  
196 mediated by specific combinations of olfactory receptors. *Science* **307** (5715), 1638–1642  
197 (2005).
- 198 15. Ha, T. S. & Smith, D.P. Pheromone receptor mediates 11-*cis*-vaccenyl acetate-induced  
199 responses in *Drosophila*. *J. Neurosci.* **26**, 8727–8733 (2006).
- 200 16. Frankel, E. N. *Lipid Oxidation*. (Woodhead Publishing, Cambridge, 2005).
- 201 17. Grillet, M., Dartevelle, L. & Ferveur, J. F. A *Drosophila* male pheromone affects female  
202 sexual receptivity. *Proc. R. Soc. B* **273**, 315–323 (2006).
- 203 18. Farine, J. P., Ferveur, J. F. & Everaerts, C. Volatile *Drosophila* cuticular pheromones are  
204 affected by social but not sexual experience. *PLoS One* **7**, e40396 (2012).
- 205 19. Yaws, C. L. & Satyro, M. A. *The Yaws handbook of vapor pressure: Antoine coefficients*.  
206 (Gulf Professional Publishing, Amsterdam, 2015).
- 207 20. Spietelun, A., Pilarczyk, M., Kloskowski, A. & Namieśnik, J. Current trends in solid-phase  
208 microextraction (SPME) fibre coatings. *Chem. Soc. Rev.* **39**, 4524–4537 (2010).
- 209 21. Das, S. *et al.* Electrical synapses mediate synergism between pheromone and food odors in  
210 *Drosophila melanogaster*. *Proc. Natl. Acad. Sci.* **114**, E9962-E9971 (2017).
- 211 22. Stensmyr, M. C. *et al.* A conserved dedicated olfactory circuit for detecting harmful microbes  
212 in *Drosophila*. *Cell* **151**, 1345–1357 (2012).
- 213 23. Paoli, M. *et al.* Minute impurities contribute significantly to olfactory receptor ligand studies:  
214 tales from testing the vibration theory. *Eneuro* **4**, ENEURO.0070-17.2017 (2017).

215 24. Choo, Y.-M. *et al.* Reverse chemical ecology approach for the identification of an oviposition  
216 attractant for *Culex quinquefasciatus*. *Proc. Natl. Acad. Sci.* **115**, 714-719 (2018).  
217

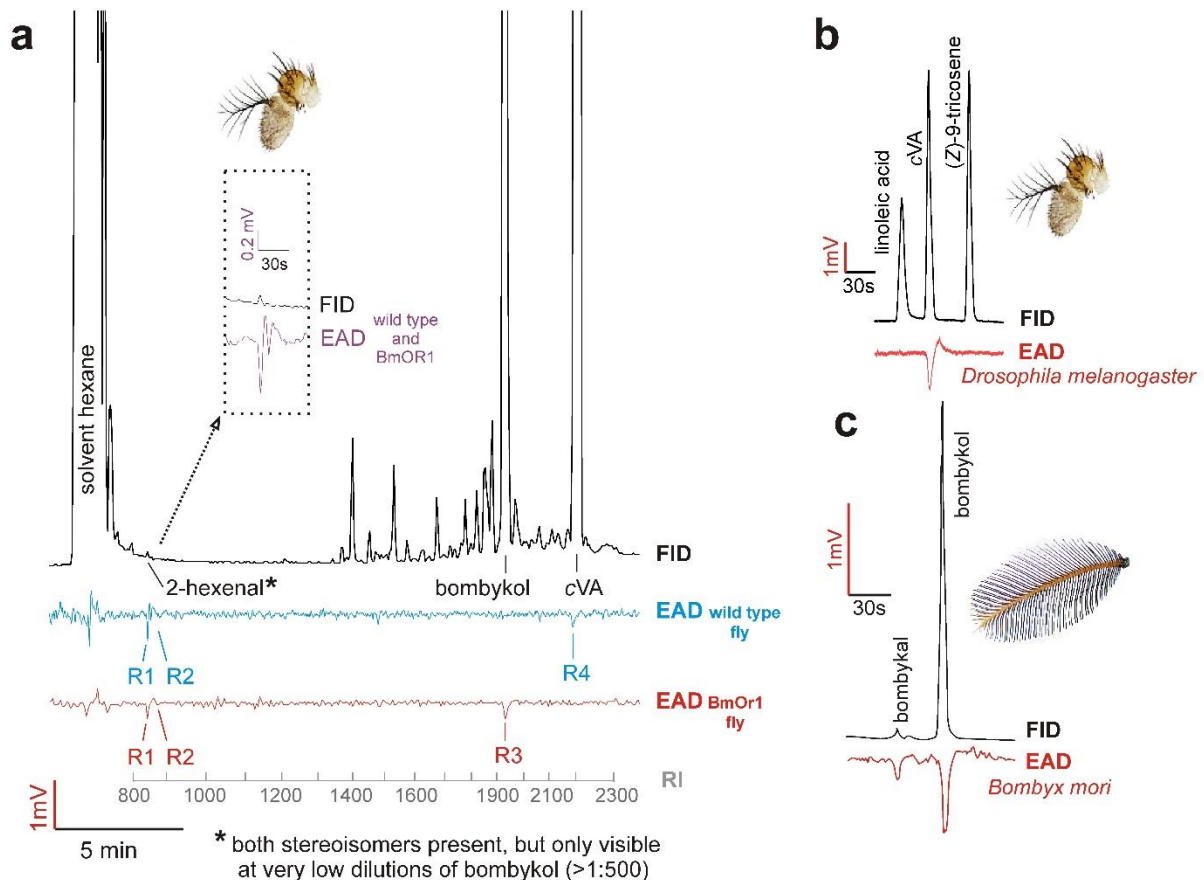

218

219 **Figure 1 | Representative responses of whole mount fly and moth antennal preparations** to compounds  
220 eluting from a GC (GC-EAD) following injection of hexane solutions of synthetic standards. **A**, Wildtype  
221 fly antennae did not respond to the main component bombykol (n=30; shown is the average of n = 8 flies),  
222 but responded (R1, R2; see magnification of the trace) to volatile impurities eluting earlier (later identified  
223 as (Z)- and (E)-2-hexenal, see Table 1) as well as to the co-injected aggregation pheromone cVA (response  
224 R4). Replacing the cVA receptor (DmOr67d) with the receptor (BmOR1) substituted the response (average



239 significant differences versus the control (n=7, p<0.05; Holm-Sidak multiple comparisons versus control)  
240 following One Way Repeated Measurements ANOVA. n.s. = not significant.  
241

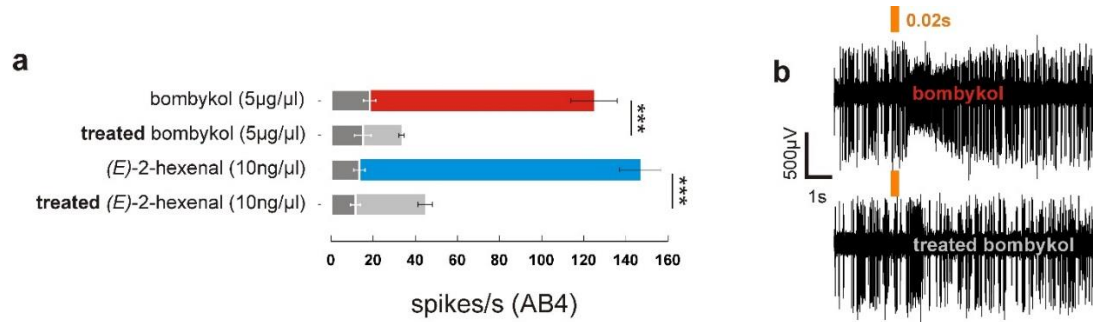

242  
243 **Figure 3 | Chemically reducing C6 aldehydes to alcohols eliminated responses (means  $\pm$ 95%CI) of**  
244 **antennal basiconic 4a neurons that were typically elicited by the untreated synthetic bombykol and**  
245 **E2H (see also fig. 2B). A, Puffs with the synthetic standard after reduction with sodium borohydride, which**  
246 **converted E2H and Z2H to the corresponding alcohols, elicited dramatically attenuated responses to the**  
247 **reduced products. Reducing synthetic E2H under the same conditions gave analogous results. Overlaid dark**  
248 **grey bars with white whiskers show the results obtained for the pre-puffing control periods. Asterisks (\*\*\*)**  
249 **indicate highly significant differences (paired t-test, n=8 different flies, p<0.001). B, Example traces of**  
250 **stimulation of the AB4a neuron with synthetic bombykol before (top) and after (bottom) sodium**  
251 **borohydride treatment.**  
252

253

254

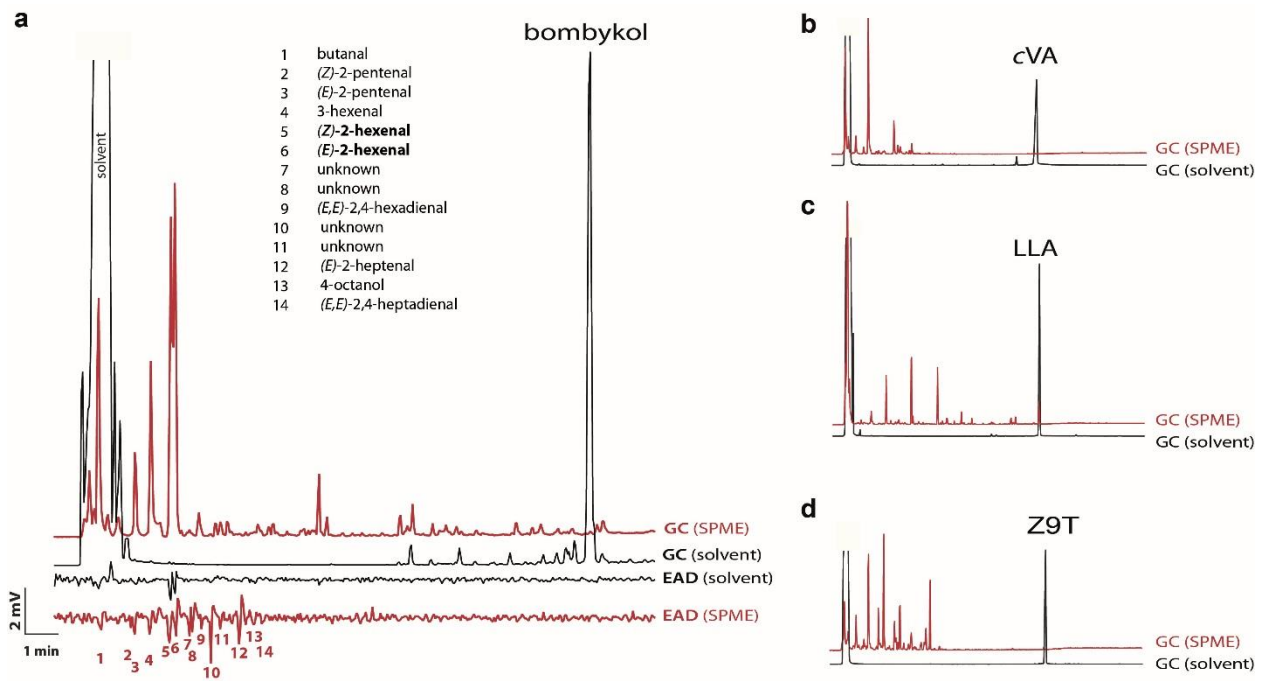

255

256

257 **Figure 4 | Concentrations of compounds in the vapour phase were orders of magnitude different than**

258 **in the bulk liquid sample. A**, Injections of solutions of standards (black) show very low abundance of

259 impurities, but the concentrations of volatile impurities can be orders of magnitude greater in the headspace

260 above the liquid samples (red, sampled using SPME), as illustrated with the synthetic standard of bombykol.

261 Accordingly, antennae may respond to confounding impurities in headspace samples (red) much more

262 intensely than when samples are injected as solutions (black), as exemplified with bombykol. **B**, **C** and **D**

263 illustrate the same phenomenon with standards of cVA, LLA, and Z9T, in which the concentrations of

264 volatile impurities in the headspace are magnified enormously relative to the main component, in

265 comparison to the concentrations in the bulk samples.

266

267

268

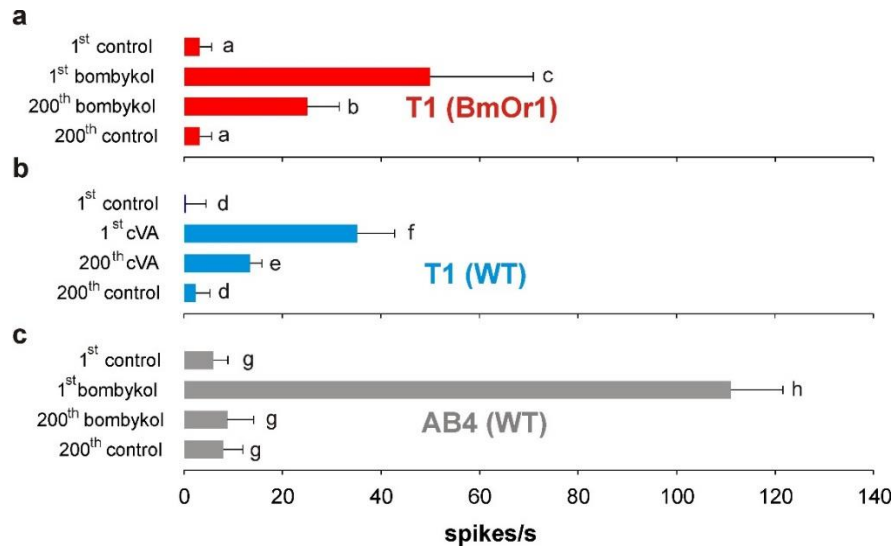

269

270

271 **Extended Data Figure 1 | Responses (means +95%CI) of sensory neurons to stimulation from fresh**  
272 **stimulus cartridges versus cartridges after 200 puffs.** While T1 neurons expressing BmOR1 (A) and  
273 wild type T1 neurons (B) responded to both fresh cVA-loaded cartridges or cartridges puffed 200 times in  
274 succession, AB4a neurons only consistently responded to fresh cartridges (C). Values with the same letters  
275 are not significantly different from each other (One Way Repeated Measurements ANOVA, followed by  
276 Holm-Sidak multiple comparisons;  $p > 0.05$ ,  $n = 5$  different flies).

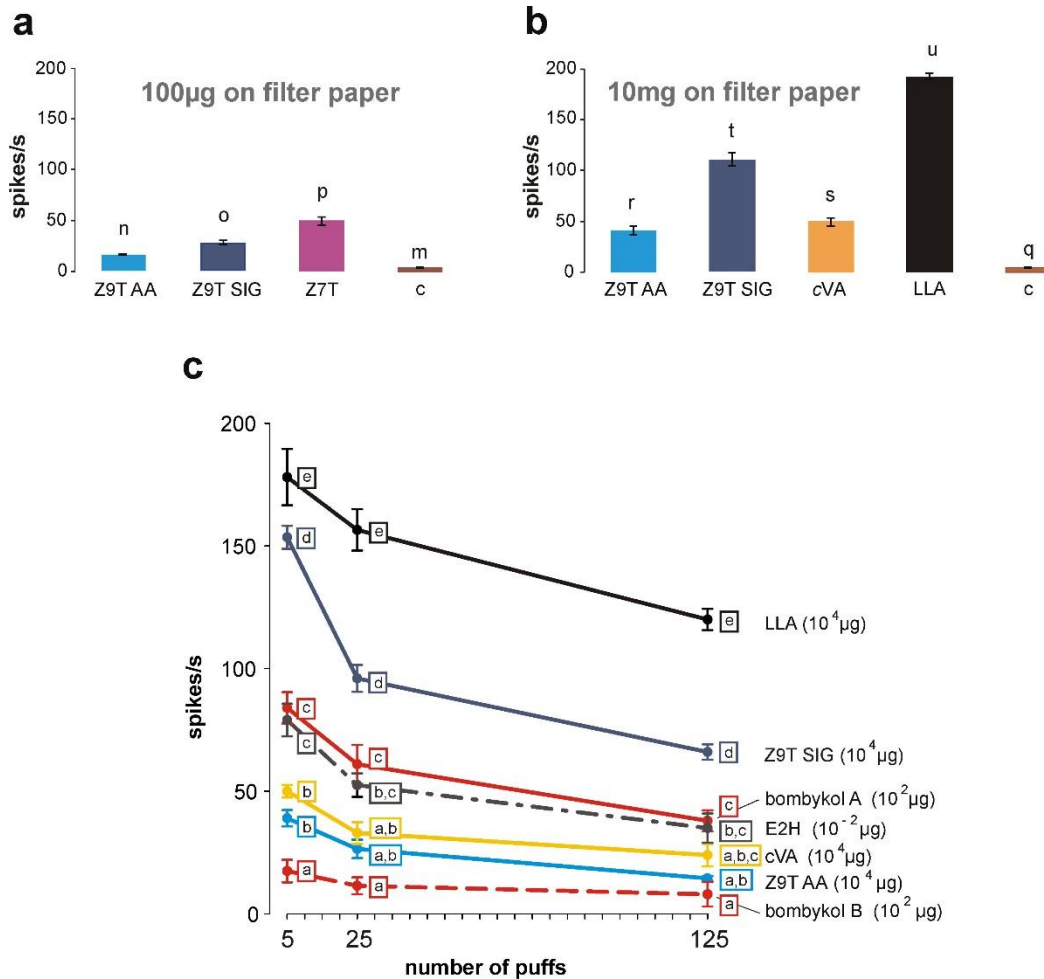

277  
278

279 **Extended Data Figure 2 | Single sensillum recordings (means ± SE) from AB4a neurons via puffing**  
 280 **using different compounds, batches and depletion series.** **A**, Z9T SIG (100 µg on filter paper) from  
 281 Sigma-Aldrich induced stronger responses by puffing than Z9T AA from Alfa-Aesar. However, a synthetic  
 282 sample of Z7T, which is more abundant than Z9T on *D. melanogaster* cuticle, induced stronger AB4a  
 283 responses (n=7 flies) than either of the Z9T synthetic samples. **B**, This also held true at higher doses (10  
 284 mg on filter paper; n=7 flies). At these amounts, even a sample of cVA induced a response (n=4 flies). LLA  
 285 was included as a reference and gave stronger responses (n=4 flies) than Z9T and cVA. **C**, responses of  
 286 AB4a neurons (n=4 flies) to odour cartridges after 5, 25, or 125 repeated stimulations with E2H (10 ng on  
 287 filter paper) or synthetic bombykol (100 µg on filter paper). Depletion of responses to Z9T (SIG, Sigma-  
 288 Aldrich; AA, Alfa Aesar), LLA and cVA standards (10 mg on filter paper) with increasing numbers of  
 289 puffs are also shown. A new batch of bombykol (dotted red line) induced significantly lower responses  
 290 from AB4a neurons compared to a batch (solid red line) received 2 years earlier (see also Extended Data  
 291 Figure 6). Values with the same letters are not significantly different from each other (One Way Repeated  
 292 Measurements ANOVA, followed by Holm-Sidak multiple comparisons; p>0.05).



293

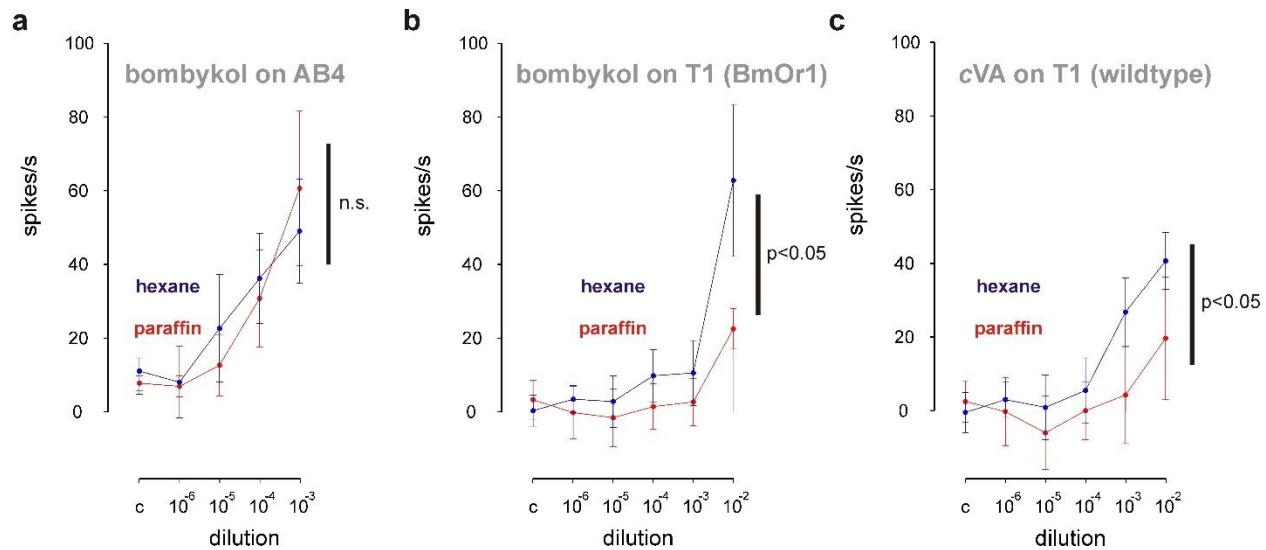

294

295 **Extended Data Figure 3 | Using paraffin oil as a solvent instead of hexane suppressed the**  
296 **volatilization of cVA and bombykol**, resulting in lower cVA-induced responses in Or67d (cVA) and  
297 bombykol-induced responses in BmOR1-expressing T1 neurons. However, paraffin oil did not significantly  
298 suppress responses in AB4a neurons to the bombykol sample. Dose response curves of AB4a (A) and T1  
299 (B,C) neurons to bombykol (A,B) and cVA (C) diluted in hexane (purple) or paraffin oil (red). Data points  
300 represent means (n=7 (A) or 8 (B, C) different flies) and their 95% confidence intervals. Two-way  
301 ANOVAs for Repeated Measurements either indicated significant (p<0.05,) or no significant (n.s.; p>0.05)  
302 differences between hexane and paraffin dilutions. Negative response values resulted when AB4a produced  
303 fewer spike/s after stimulation compared to pre-puffing control periods (see methods).

304

305



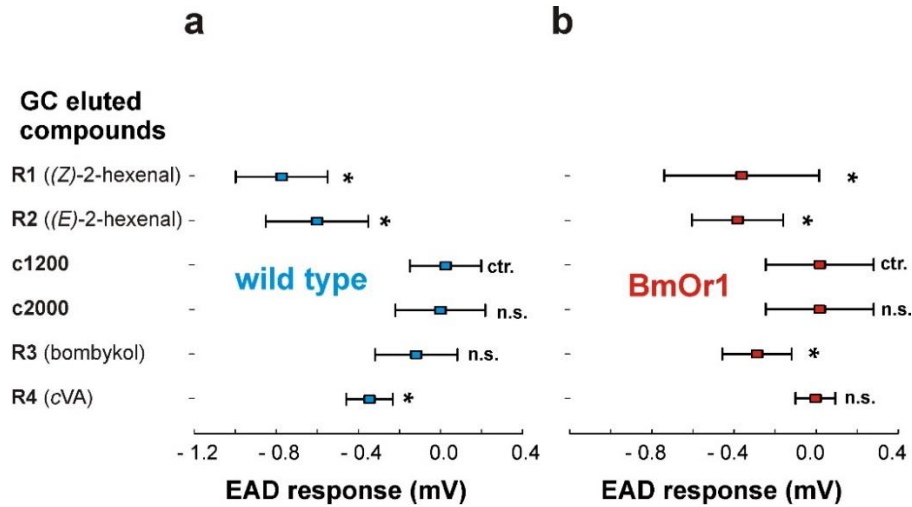

306

307

308 **Extended Data Figure 4 | Statistical comparison of *Drosophila* antennal responses (EAD) to**  
 309 **compounds eluting off the GC (see Figure 1) relative to controls. A, Wildtype fly antennae (n=8 flies),**  
 310 **and, B, Fly antennae expressing BmOR1 instead of Or67d in T1 neurons (n=8 flies). Responses (means**  
 311 **±95% CI): R1 to (Z)-2-hexenal; R2 to (E)-2-hexenal; R3 to bombykol; R4 to cVA; c1200 and c2000, control**  
 312 **responses measured at Kováts Retention Indices 1200 and 2000, respectively. Asterisks (\*) indicate**  
 313 **significant differences from the control (p<0.05, Holm-Sidak multiple comparisons versus control c1200)**  
 314 **following One Way ANOVA analyses (n= 2x 8 different flies). n.s. = not significant.**

315

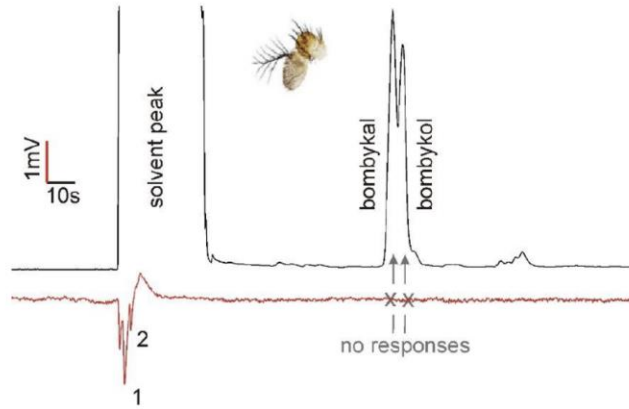

316

317 **Extended Data Figure 5 | Responses of wildtype flies in GC-EAD assays to a blend of bombykol and**  
318 **bombykal (10 µg each in hexane) with a chromatography temperature program adapted for fast screening**  
319 **of low volatility compounds (starting at 260°C, instead of 50°C). Fly antennae consistently responded to**  
320 **early eluting compounds (1,2), but showed no responses (n=7) to either bombykol or bombykal.**

321

322

323

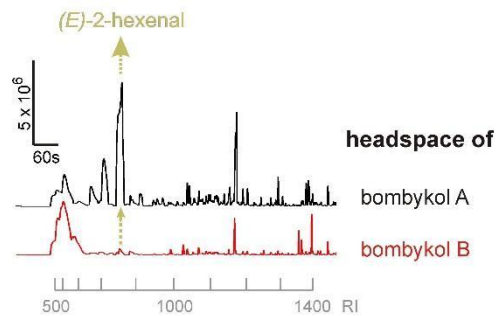

324

325 **Extended Data Figure 6 | SPME analysis showing that the headspace of different batches of synthetic**  
326 **bombykol varied substantially in the quantities of impurities, particularly (E)-2-hexenal with the Kováts**  
327 **retention index (RI) of 860.**

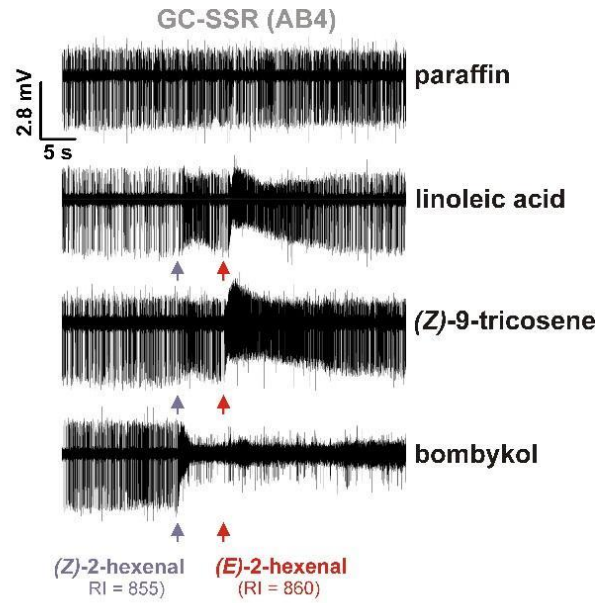

328

329 **Extended Data Figure 7 | AB4a neurons responded to shared impurities present in the headspace of**

330 **bombykol, Z9T, and LLA.** Aligned segments of GC-SSR traces show that at retention indexes of 885 and

331 860, injected headspace samples (SPME) of bombykol, Z9T, and LLA contain both isomers of 2-hexenal,

332 which, of all compounds in the injected samples, elicited the largest responses from AB4a neurons.

333

334

335

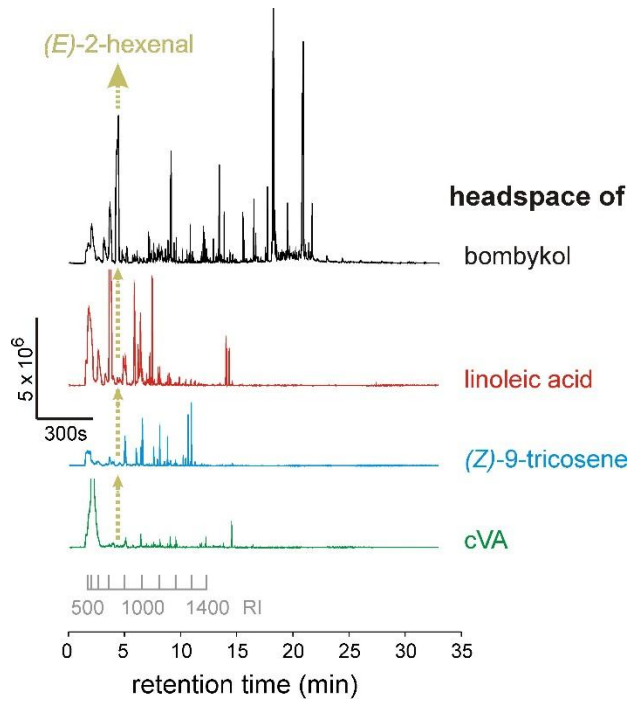

336

337 **Extended Data Figure 8 | SPME profiles from synthetic standards of bombykol, Z9T, and LLA. The**

338 various GC traces demonstrate that the amount of E2H differs substantially between these synthetic

339 standards, and correspondingly the responses of AB4a neurons to these.

340

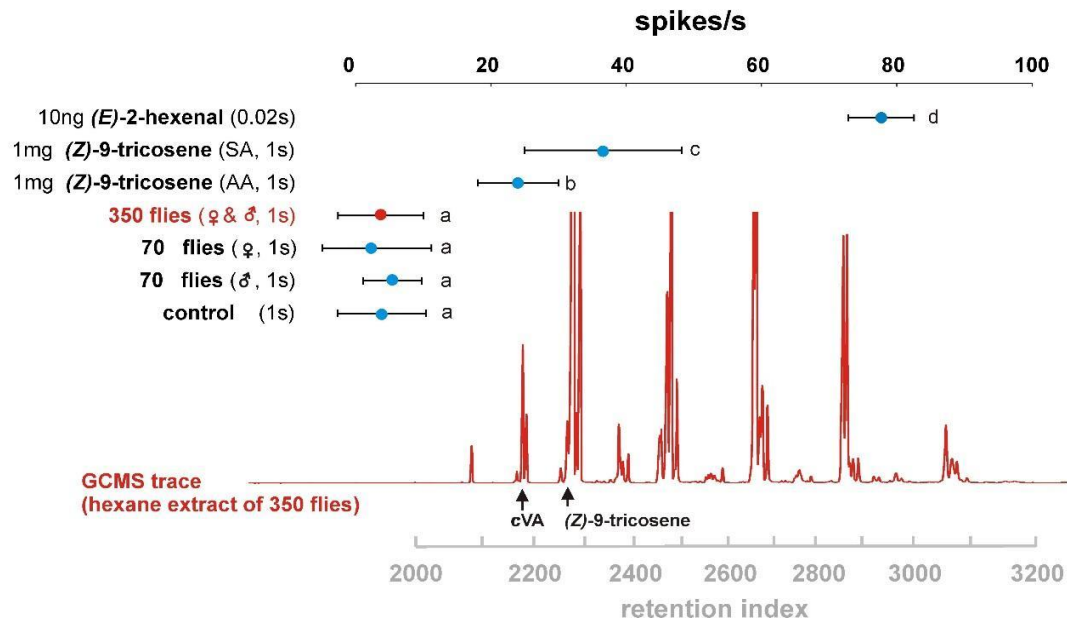

341

342

343 **Extended Data Figure 9 | GC-MS profile of cuticular extracts of *Drosophila* and corresponding AB4a**

344 **neuron responses when puffed with the extracts or with synthetic compounds.** Whereas batches of

345 synthetic E2H and Z9T (SIG, Sigma-Aldrich; AA, Alfa Aesar) induced robust responses in AB4a neurons,

346 no responses were observed to a puffed extract of 350 fly equivalents of mixed sex applied on filter paper,

347 to 70 fly equivalents of male or female flies, or to the control (hexane solvent). The solvent was evaporated

348 before the 1s stimulation, E2H lasted for 0.02s. Values (means  $\pm$ 95% confidence intervals) surmounted by

349 the same letters are not significantly different from each other (One Way Repeated Measurements ANOVA,

350 followed by Holm-Sidak multiple comparisons;  $p > 0.05$ ,  $N = 7$  different flies). GC-MS trace (red) is from an

351 extract of 350 mixed sex flies.

352

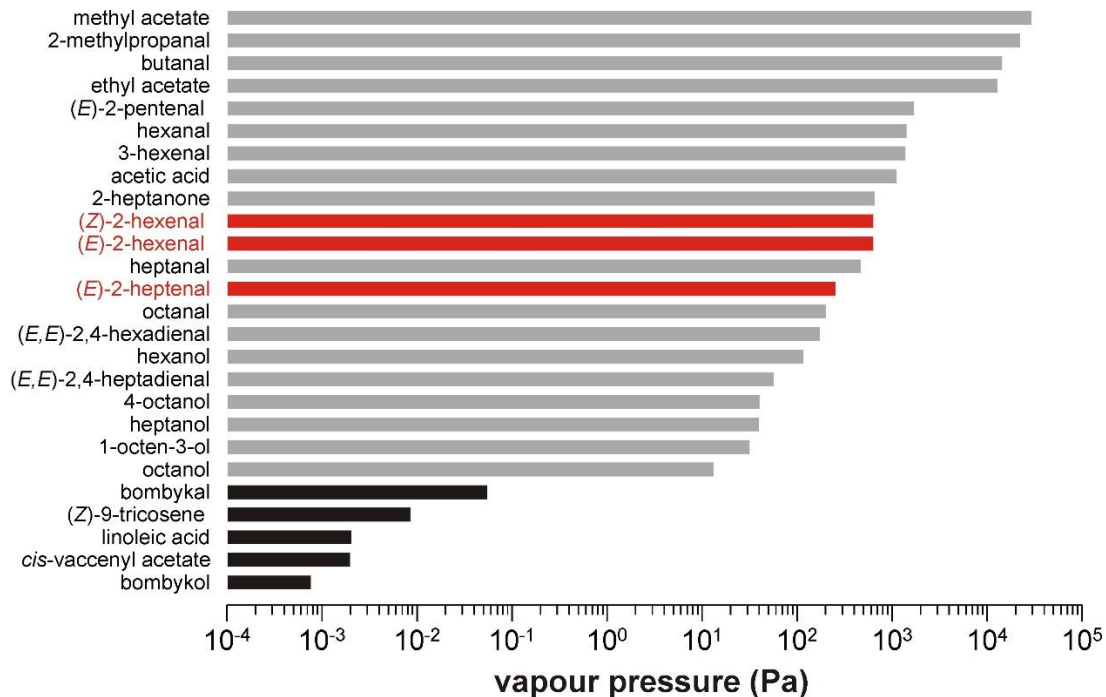

353

354 **Extended Data Figure 10** | Impurities in synthetic compounds can have dramatically higher vapour

355 pressures than the compounds themselves. The bars represent the calculated values of various impurities

356 (see supplementary table 5) arranged in order of decreasing volatility, and presented on a logarithmic scale.

357 Black bars show the values for the compounds studied in the present work. Grey and red bars show the

358 values for those identified impurities that elicited physiological responses. The three physiologically most

359 important impurities with regard to the antennal basiconic 4a neurons of *D. melanogaster* are shown in red

360 (see also tables 1-3).

361

362

---

363 **METHODS**

364

365 **Insects.** The wildtype *Drosophila melanogaster* (Meigen 1830; Diptera, Drosophilidae) were originally  
366 collected in 2007 from Dalby, Skåne county, Sweden<sup>25</sup>. Transgenic *D. melanogaster* expressing *Bombyx*  
367 *mori* receptor BmOR1 in T1 sensilla were created by crossing OR67d-Gal4 lines (gift from Barry Dickson,  
368 Janelia Research Campus, VA, USA) with UAS-BmOR1 (gift from Walter Leal, University of California,  
369 Davis CA, USA) to create w;UAS-BmOR1/CyO;OR67d-Gal4/MKRS, which were selected to obtain  
370 homozygous flies<sup>26,27,28</sup> for recordings. Experimental flies were 3-8 days old. Stocks were kept on standard  
371 cornmeal-yeast-agar diet under a 12 L:12 D photoperiod and at 22 °C.

372 *Bombyx mori* (Linnaeus 1758; Lepidoptera, Bombycidae) was obtained either from Agri Pet  
373 Garden (Conselve, Italy) or Bugs-World (Budapest, Hungary). Larvae were either fed on a commercial diet  
374 (Agri Pet Garden, a mixture of dried & ground mulberry leaves with corn meal, soy meal, agar and water)  
375 or on freshly collected mulberry foliage. Larvae were kept in a climatic chamber (26±1 °C, 65±5% RH, 16h  
376 light: 8h dark photoperiod) and moved to new boxes every 2-3 days with fresh food. Pupae were removed  
377 and placed in boxes lined with paper until eclosion.

378

379 **Chemicals and stimuli**

380 Synthetic compounds were acquired from mostly commercial sources with the highest purity available.  
381 (10*E*,12*Z*)-10,12-Hexadecadien-1-ol (bombykol, purity >95%), (10*E*,12*Z*)-10,12-hexadecadien-1-al  
382 (bombykal, purity >95%), and (*Z*)-11-octadecenyl acetate (*cis*-vaccenyl acetate, *cVA*) were obtained from  
383 Pherobank (Wijk bij Duurstede, The Netherlands). (*Z*)-9-Tricosene was purchased from Sigma-Aldrich  
384 (Bellefonte, PA, USA) (purity >97%) and Alfa-Aesar (Haverhill, MA, USA) (purity 96%). Other  
385 chemicals, including alkane standards for calculation of retention indices (purity ≥99% each), mineral oil  
386 (CAS: 8042-47-5), (9*Z*,12*Z*)-9,12-octadecadienoic acid (linoleic acid, LLA, purity 99%) and (*E*)-2-hexenal  
387 (98% purity) were obtained from Sigma-Aldrich.

388 (Z)-7-Tricosene was synthesized as follows: sodium hexamethyldisilazide (NaHMDS, 0.75 M in  
389 tetrahydrofuran, THF) was added to a slurry of hexadecyltriphenylphosphonium bromide (3.98 g, 7 mmol)  
390 in THF at 0°C under argon until an orange color persisted, followed by addition of another 9.3 ml (7 mmol)  
391 of NaHMDS solution. The resulting mixture was stirred 1 h at 0°C, then cooled to -78°C in a dry ice-  
392 acetone bath, and heptanal (0.74 g, 6.5 mmol) in 4 ml THF was added dropwise. The mixture was allowed  
393 to warm to room temp over several hours, then quenched with dilute aqueous NH<sub>4</sub>Cl, and extracted with  
394 hexane. The hexane extract was washed with water and brine, dried over anhydrous Na<sub>2</sub>SO<sub>4</sub>, and  
395 concentrated. The residue was triturated with hexane, and the soluble portion was purified by vacuum flash  
396 chromatography on silica gel, eluting with hexane. The purified product was then recrystallized from  
397 acetone at -20°C overnight, yielding 1.34 g of a white solid which melted at ~0°C. The recrystallized product  
398 contained about 3% of the (*E*)-isomer.

399 For fly extracts, flies were first freeze-killed (~10 min at -20°C) and then placed into a clean 1.5  
400 ml glass vial to which 3 µl of hexane were added per fly (e.g. 1050 µl for 350 flies) at room temperature.  
401 The glass was gently shaken for 5 min once a minute and the resulting cuticular extract was transferred to  
402 another glass vial. The extract was concentrated by letting the excess hexane evaporate under a gentle  
403 nitrogen flow until ~100 µl of the extract remained. The remaining extract was transferred to a 300 µl glass  
404 insert, to carefully further concentrate the extract down to 30 µl. The same procedure was followed for the  
405 control (hexane without flies).

406 Stimuli were diluted in either *n*-hexane (Merck, purity ≥99%) or in mineral oil, and 10 µl (30 µl  
407 for fly extracts and their controls) of solutions were applied to filter paper disks (12.7 mm Ø; Schleicher  
408 222 & Schnell GmbH, Dassel, Germany) placed inside Pasteur pipettes. Sodium borohydride (Sigma-  
409 Aldrich, purity ≥96%) was used to reduce the aldehydes present in the batches of 2-hexenal and bombykol  
410 to the corresponding alcohols (e.g. (*E*)-2-hexenal to (*E*)-2-hexenol) by adding 25 µl of a saturated solution  
411 of NaBH<sub>4</sub> in ethanol (≥99.9%; Sigma-Aldrich) to 25 µl of hexane solutions of either bombykol (2 mg) or  
412 2-hexenal (4 µg), respectively, at room temperature. After 5 min, the mixtures were diluted with hexane so  
413 as to achieve the desired experimental dilutions (bombykol: 5 µg/µl; E2H: 10 ng/µl). We confirmed the



414 successful reduction of the aldehydes by GCMS analysis. Controls consisted of hexane solutions of  
415 bombykol and 2-hexenal which were treated only with EtOH. For GCMS assisted verification of (*Z*)-2-  
416 hexenal a solution of (*Z*)-2-hexenol (0.1 g, 1 mmol) in 5 ml CH<sub>2</sub>Cl<sub>2</sub> was cooled in an icebath, and finely  
417 powdered pyridinium dichromate (0.56 g, 1.5 mmol) was added in one portion. The mixture was stirred  
418 for 2 h at 0°C, then diluted with 15 ml ether and filtered through a plug of celite filtering aid. The resulting  
419 crude product contained an ~1:1 ratio of the (*Z*)- and (*E*)-isomers, as determined by comparison of the  
420 retention time of the second isomer with that of an authentic standard or (*E*)-2-hexenal.

421

### 422 **Electrophysiological recordings**

423 For electrophysiological recordings, flies were immobilized in pipette tips with the antennae protruding  
424 from the tip. Preparations were placed under a continuous charcoal-filtered, humidified air stream (1 l min<sup>-1</sup>  
425 <sup>1</sup>). Stimuli were injected into this airstream using either a stimulus controller (CS-55, Syntech, Kirchzarten,  
426 Germany) or as the column effluent from the gas chromatograph (see below). Signals from whole mount  
427 antennae (electroantennogram, EAG, using glass electrodes) or single sensilla (SSR, using tungsten  
428 electrodes) were collected simultaneously with GC signals (GC-EAD and GC-SSR, respectively), using  
429 Syntech hardware and software following established methods<sup>4,28</sup>. Responses of single neurons were  
430 expressed as spikes s<sup>-1</sup> following stimulation, minus the average spike activity in a 1 s prestimulus window.  
431 For depletion series, stimulus cartridges were puffed repeatedly into an exhaust vent at 5 s intervals. Other  
432 details, such as stimulus load and duration, are noted in the text and figures.

433

### 434 **Headspace collections, gas chromatography (GC), coupled gas chromatography-mass spectrometry 435 (GC-MS) and identifications**

436 Headspace volatiles were collected for 20 min at room temperature using a solid-phase microextraction  
437 (SPME, 50/30 μm DVB/CAR/PDMS StableFlex fiber, Supelco/Sigma-Aldrich, Bellefonte, PA) inserted  
438 into a 1.5 mL screwcap vial either empty (control) or loaded with 10 μl of the standard being sampled. The  
439 fibre was cleaned before use by desorption for 10 min in a 250°C GC injector port. The pre-sampling

440 headspace equilibration time was 10 min. Volatiles collected on the fibre were thermally desorbed directly  
441 into the splitless injector of the GC or GC-MS for 0.5 min at 250°C.

442 GC, GC-EAD, GC-SSR, and GC-MS usually employed a HP-5 capillary column (GC-EAD: 30 m  
443 × 0.32 mm × 0.25 µm film; GC-MS: 30 (later 60) m × 0.25 mm × 0.25 µm film, Agilent Technologies,  
444 Santa Clara, CA). For Kováts Index-aided verification of structures we also employed DB-WAX columns  
445 (either 30 m × 0.32 mm × 0.25 µm film or 60 m × 0.25 mm × 0.25 µm film; Agilent) with helium as carrier  
446 gas at 1.84 ml min<sup>-1</sup>. The HP-5 column was used with a temperature program of 50°C/1 min, then 10°C  
447 min<sup>-1</sup> to 315°C, hold for 10 min, whereas the DB-WAX column was programmed from either 35°C/1 min  
448 or 30°C/3 min, then 8°C min<sup>-1</sup> to 230°C for 5 min, unless stated otherwise. For GC-EAD/SSR the effluent  
449 was split equally between the flame ionization detector and an antennal preparation, with the portion  
450 directed to the antennal preparation exiting via a heated transfer line into a 1 l min<sup>-1</sup> clean humidified  
451 airstream as described above. Electrophysiological and GC signals were integrated using an IDAC-4 A/D  
452 converter (Syntech).

453 Samples were analysed by GC-MS (HP 5890 GC and HP 5975 MS instruments, Agilent) in electron  
454 impact ionization mode at 70 eV, scanning a mass range of  $m/z$  29–300, at 5 scans s<sup>-1</sup>. Single Ion Monitoring  
455 was occasionally employed for trace identification of specific compounds, as specified in the tables.  
456 Compounds were tentatively identified by comparison of their mass spectra with mass spectral databases  
457 (NIST11 and Wiley) and published Kováts indices, and verified through injection of authentic standards  
458 where possible, as specified in the tables.

459

#### 460 **Vapour pressure calculations**

461 The vapour pressure values were estimated at 25°C, calculated according to the instructions and methods  
462 described in Yaws (2015)<sup>18</sup>. When calculation estimation requirements or missing experimental data did  
463 not allow this, estimates were calculated using EPI Suite™ (v4.11, June 2017), a freely available software  
464 developed by the EPA's Office of Pollution Prevention Toxics and Syracuse Research Corporation (SRC  
465 Inc.) for the U.S. Environmental Protection Agency.

466

## 467 **Statistical analyses**

468 Statistical analyses described in the text and figure legends were performed two-sided using Sigmastat 4.0  
469 (Systat Software Inc.), or R 3.2.0 software (R Development Core Team 2015). When the assumptions of  
470 normality (Shapiro–Wilk test  $p > 0.05$ ) and equal variance (Spearman rank correlation  $p > 0.05$ ) were not  
471 met, the data (Extended Data Figures 2a, 3b and 3c) were  $\ln$  –transformed prior to analysis if the  
472 assumptions could thus be successfully met.

473

474

475

- 476 25. Ruebenbauer, A., Schlyter, F., Hansson, B. S., Löfstedt, C., & Larsson, M. C. Genetic  
477 variability and robustness of host odor preference in *Drosophila melanogaster*. *Curr. Biol.*, **18**  
478 1438-1443 (2008).
- 479 26. Brand, A. H., & Perrimon, N. Targeted gene expression as a means of altering cell fates and  
480 generating dominant phenotypes. *Development*, **118**, 401-415 (1993).
- 481 27. Greenspan, R. J. *Fly pushing: the theory and practice of Drosophila genetics*. Cold Spring  
482 Harbor Laboratory Press, New York (2004).
- 483 28. Molnár, B. P., Tóth, Z. & Zsolt Kárpáti. Synthetic blend of larval frass volatiles repel  
484 oviposition in the invasive box tree moth, *Cydalima perspectalis*. *J. Pest Sci.* **90**, 873-885  
485 (2017).

**Extended Data Table 1 Impurities found in a synthetic standard of bombykol ((10E,12Z)-10,12-hexadecadienol) by GCMS analysis of headspace volatiles collected by solid phase microextraction.** Compounds which were also detected

in the control (glass vial without a sample) were excluded if they were not found within treatments in substantially higher amounts (> 200%). Shown are measured Kováts retention indices (RI), percent relative to the most abundant compound, and percent relative to (*E*)-2-hexenal in the sample. Only compounds which either elicited a reproducible electrophysiological response, or occurred in amounts greater than 5% relative to the main compound peak area were included in the table. The asterisk indicates the compound that was mainly responsible for eliciting responses from the *D. melanogaster* AB4a neuron. Compounds were tentatively identified by matches with NIST database spectra, and where possible, identifications were confirmed by matching retention times and mass spectra with those of authentic standards. Positive GC-EAD and GC-SSR responses are indicated; responses in red were also observed with injected samples of bombykol (1 µg). Listed in addition are chemoreceptors reported (DoOR 2.0 database<sup>9</sup>) to respond most strongly to a given compound. The reported response level, ranging from 0 (no response) to 1 (max excitation), is indicated within brackets.

| Nr. | Kováts RI  | area rel. high. peak | area rel. E2H* | name                                         | CAS                | library data match | verified by synthetic | EAD response | SSR response (AB4A) | responding chemoreceptor unit (response level <sup>9</sup> ) |
|-----|------------|----------------------|----------------|----------------------------------------------|--------------------|--------------------|-----------------------|--------------|---------------------|--------------------------------------------------------------|
| 1   | 606        | 41.55%               | 63.96%         | butanal                                      | 000123-72-8        | +                  |                       | +            |                     | Ir64a.DC4 (0.58); 35a (0.55); 69a (0.34)                     |
| 2   | 653        | 2.92%                | 4.49%          | 2-butenal <sup>1)</sup>                      | 004170-30-3        | +                  |                       |              | +                   |                                                              |
| 3   | 706        | 8.87%                | 13.65%         | unknown                                      |                    |                    |                       |              |                     |                                                              |
| 4   | 749        | 0.63%                | 0.97%          | ( <i>Z</i> )-2-pentenal <sup>2)</sup>        | 001576-86-9        |                    |                       | +            | +                   |                                                              |
| 5   | 757        | 19.50%               | 30.02%         | ( <i>E</i> )-2-pentenal                      | 001576-87-0        | +                  | +                     | +            | +                   |                                                              |
| 6   | 804        | 49.55%               | 76.27%         | 3-hexenal <sup>1)</sup>                      | 004440-65-7        | +                  | +                     | +            | +                   |                                                              |
| 7   | 844        | 12.53%               | 19.28%         | butanoic acid                                | 000107-92-6        | +                  |                       |              |                     |                                                              |
| 8   | 855        | 100.00%              | 153.93%        | ( <i>Z</i> )-2-hexenal                       | 016635-54-4        | +                  | +                     | +            | +                   |                                                              |
| 9   | <b>862</b> | <b>64.96%</b>        | <b>100.00%</b> | <b>(<i>E</i>)-2-hexenal*</b>                 | <b>006728-26-3</b> | +                  | +                     | +            | +                   | <b>7a (0.83)</b> ; ac3B (0.066); 35a (0.66)                  |
| 10  | 894        | 4.65%                | 7.15%          | unknown                                      |                    |                    |                       | +            |                     |                                                              |
| 11  | 902        | 0.25%                | 0.38%          | unknown                                      |                    |                    |                       | +            |                     |                                                              |
| 12  | 913        | 7.76%                | 11.94%         | ( <i>E,E</i> )-2,4-hexadienal <sup>3)</sup>  | 000142-83-6        | +                  |                       | +            |                     |                                                              |
| 13  | 933        | 0.21%                | 0.32%          | unknown                                      |                    |                    |                       | +            |                     |                                                              |
| 14  | 938        | 0.28%                | 0.43%          | unknown                                      |                    |                    |                       | +            |                     |                                                              |
| 15  | 960        | 3.26%                | 5.02%          | ( <i>E</i> )-2-heptenal                      | 018829-55-5        | +                  | +                     | +            | +                   | ac3B (0.68);                                                 |
| 16  | 991        | 1.70%                | 2.62%          | 4-octanol                                    | 000589-62-8        | +                  |                       | +            |                     | 69a (0.65); 13a (0.35)                                       |
| 17  | 1013       | 1.22%                | 1.89%          | ( <i>E,E</i> )-2,4-heptadienal <sup>3)</sup> | 004313-03-5        | +                  |                       | +            |                     |                                                              |
| 18  | 1040       | 6.45%                | 9.92%          | unknown                                      |                    |                    |                       |              |                     |                                                              |
| 19  | 1172       | 26.17%               | 40.28%         | unknown                                      |                    |                    |                       |              |                     |                                                              |
| 20  | 1174       | 13.60%               | 20.94%         | nonanol                                      | 000143-08-8        | +                  |                       |              |                     |                                                              |
| 21  | 1259       | 6.84%                | 10.53%         | unknown                                      |                    |                    |                       |              |                     |                                                              |
| 22  | 1309       | 5.90%                | 9.07%          | unknown                                      |                    |                    |                       |              |                     |                                                              |

<sup>1)</sup> (*E*)/(*Z*) composition not determined <sup>2)</sup> assumed due to Kováts retention index

<sup>3)</sup> double bond position and (*E*) configuration only assumed due to high correlation with NIST library data

**Extended Data Table 2 Impurities found in a synthetic standard of linoleic acid ((9Z,12Z)-9,12-octadecadienoic acid) by GCMS analysis of headspace volatiles collected by solid phase microextraction.**

Compounds which were also detected in the control (glass vial without a sample) were excluded if they were not found within treatments in substantially higher amounts (> 200%). Shown are measured Kováts retention indices (RI), percent relative to the most abundant compound, and percent relative to (*E*)-2-hexenal in the bombykol sample (table 1). Only compounds which either elicited a reproducible electrophysiological response, or occurred in amounts greater than 5% relative to the peak area of the main compound were included in the table. The asterisks indicate the compounds that were mainly responsible for eliciting responses from the *D. melanogaster* AB4a neuron. Compounds were tentatively identified by matches with NIST database spectra, and where possible by comparison with authentic standards. Positive GC-EAD and GC-SSR responses are indicated; responses in red were also observed with injected samples of linoleic acid (1 µg). Listed in addition are chemoreceptors reported (DoOR 2.0 database<sup>9</sup>) to respond most strongly to a given compound. The reported response level, ranging from 0 (no response) to 1 (max excitation), is indicated within brackets.

| Nr. | Kováts RI  | area rel. high. peak | area rel. E2H* | name                              | CAS                | library data match | verified by synthetic | EAD response | SSR response (AB4A) | responding chemoreceptor unit (response level <sup>9</sup> ) |
|-----|------------|----------------------|----------------|-----------------------------------|--------------------|--------------------|-----------------------|--------------|---------------------|--------------------------------------------------------------|
| 1   | 556        | 33.03%               | 25.58%         | 2-methylpropanal                  | 000078-84-2        | +                  |                       | +            |                     |                                                              |
| 2   | 700        | 25.09%               | 19.43%         | heptane                           | 000142-82-5        | +                  |                       |              |                     |                                                              |
| 3   | 752        | <0.1%                | <0.1%          | 2-pentenal (traces) <sup>1)</sup> | 000764-39-6        | +                  |                       |              | +                   |                                                              |
| 4   | 806        | 100.00%              | 77.43%         | hexanal                           | 000066-25-1        | +                  | +                     | +            | +                   | 85b (0.69); ac3B (0.65); 35a (0.56)                          |
| 5   | 855        | 0.76%                | 0.59%          | ( <i>Z</i> )-2-hexenal            | 016635-54-4        | +                  | +                     | +            | +                   |                                                              |
| 6   | <b>856</b> | <b>1.94%</b>         | <b>1.50%</b>   | <b>(<i>E</i>)-2-hexenal*</b>      | <b>006728-26-3</b> | +                  | +                     | +            | <b>+</b>            | <b>7a (0.83)</b> ; ac3B (0.066); 35a (0.66)                  |
| 7   | 870        | 3.15%                | 2.44%          | hexanol                           | 000111-27-3        | +                  |                       | +            |                     |                                                              |
| 8   | 894        | 9.16%                | 7.09%          | 2-heptanone                       | 000124-11-8        | +                  | +                     | +            |                     | 85c (0.65); 85b (0.65); 98a (0.62)                           |
| 9   | 904        | 2.53%                | 1.96%          | heptanal                          | 000111-71-7        | +                  |                       | +            |                     | ac3B (0.59); 22a (0.50); 13a (0.28)                          |
| 10  | 908        | 7.43%                | 5.76%          | unknown                           |                    |                    |                       |              |                     |                                                              |
| 11  | 929        | 0.67%                | 0.52%          | unknown                           |                    |                    |                       | +            |                     |                                                              |
| 12  | 948        | 0.52%                | 0.41%          | ( <i>Z</i> )-2-heptenal           | 057266-86-1        | +                  |                       | +            | +                   |                                                              |
| 13  | <b>960</b> | <b>21.63%</b>        | <b>16.75%</b>  | <b>(<i>E</i>)-2-heptenal*</b>     | <b>018829-55-5</b> | +                  | +                     | +            | <b>+</b>            | ac3B (0.68)                                                  |
| 14  | 981        | 8.60%                | 6.66%          | 1-octen-3-ol                      | 003391-86-4        | +                  |                       | +            |                     | 13a (0.79); 85c (0.69); 98a (0.58)                           |
| 15  | 989        | 1.44%                | 1.11%          | unknown                           |                    |                    |                       | +            |                     |                                                              |
| 16  | 994        | 17.54%               | 13.58%         | 2-pentyl furan                    | 003777-69-3        | +                  |                       |              |                     |                                                              |
| 17  | 1005       | 2.62%                | 2.03%          | octanal                           | 000124-13-0        | +                  |                       | +            |                     | 35a (0.48); 69a (0.30); ac3B (0.27)                          |
| 18  | 1062       | 17.56%               | 13.60%         | 2-octenal <sup>1)</sup>           | 002363-89-5        | +                  |                       |              |                     |                                                              |

<sup>1)</sup> (*E*)/(*Z*) composition not determined

**Extended Data Table 3 Impurities found in a synthetic standard of (Z)-9-tricosene by GCMS analysis of headspace volatiles collected by solid phase microextraction.** Compounds which were also detected in the control (glass vial without a sample) were excluded if they were not found within treatments in substantially higher amounts (> 200%). Shown are measured Kováts retention indices (RI), percent relative to the most abundant compound, and percent relative to (*E*)-2-hexenal in the bombykol sample (Table 1). Only compounds which either elicited a reproducible electrophysiological response, or occurred in amounts greater than 5% relative to the peak area of the main compound were included in the table. The asterisk indicates the compound that was mainly responsible for eliciting responses from the *D. melanogaster* AB4a neuron. Compounds were tentatively identified by matches with NIST database spectra, and where possible by comparison with authentic standards. Positive GC-EAD and GC-SSR responses are indicated. Listed in addition are chemoreceptors reported (DoOR 2.0 database<sup>9</sup>) to respond most strongly to a given compound. The reported response level, ranging from 0 (no response) to 1 (max excitation), is indicated within brackets.

| Nr. | Kováts RI  | area rel. high. peak | area rel. E2H* | name                  | CAS                | library data match | verified by synthetic | EAD response | SSR response (AB4A) | responding chemoreceptor unit (response level <sup>9</sup> ) |
|-----|------------|----------------------|----------------|-----------------------|--------------------|--------------------|-----------------------|--------------|---------------------|--------------------------------------------------------------|
| 1   | 574        | 25.84%               | 1.69%          | unknown               |                    |                    |                       |              |                     |                                                              |
| 2   | 612        | 37.62%               | 2.46%          | acetic acid           | 000064-19-7        | +                  |                       | +            |                     | Ir64a.DC4 (1.00); ac2 (0.70); Ir75a (0.56)                   |
| 3   | 678        | 10.31%               | 0.67%          | unknown               |                    |                    |                       |              |                     |                                                              |
| 4   | 700        | 26.35%               | 1.72%          | heptane               | 000142-82-5        | +                  |                       |              |                     |                                                              |
| 5   | 774        | 9.06%                | 0.59%          | unknown               |                    |                    |                       |              |                     |                                                              |
| 6   | 806        | 41.02%               | 2.68%          | hexanal               | 000066-25-1        | +                  |                       | +            |                     | 85b (0.69); ac3B (0.65); 35a (0.56)                          |
| 7   | 850        | traces               | traces         | (Z)-2-hexenal         | 016635-54-4        | +                  | +                     | +            | +                   |                                                              |
| 8   | <b>858</b> | <b>traces</b>        | <b>traces</b>  | <b>(E)-2-hexenal*</b> | <b>006728-26-3</b> | +                  | +                     | +            | +                   | <b>7a (0.83)</b> ; ac3B (0.066); 35a (0.66)                  |
| 9   | 867        | 5.90%                | 0.39%          | hexanol               | 000111-27-3        | +                  |                       | +            |                     | 67b (0.74); ac3B (0.72); 35a (0.71)                          |
| 10  | 890        | 1.74%                | 0.11%          | 2-heptanone           | 000110-43-0        | +                  |                       | +            |                     | 85c (0.65); 85b (0.65); 98a (0.62)                           |
| 11  | 901        | 98.60%               | 6.44%          | heptanal              | 000111-71-7        | +                  |                       | +            |                     | ac3B (0.59); 22a (0.50); 13a (0.28)                          |
| 12  | 956        | 1.63%                | 0.11%          | (E)-2-heptenal        | 002463-63-0        | +                  | +                     | +            |                     | ac3B (0.68)                                                  |
| 13  | 968        | 45.96%               | 3.00%          | heptanol              | 000111-70-6        | +                  |                       | +            |                     | 35a (0.73); 85c (0.73); 67b (0.55)                           |
| 14  | 980        | 1.89%                | 0.12%          | unknown               |                    |                    |                       | +            |                     |                                                              |
| 15  | 1004       | 100.00%              | 6.53%          | octanal               | 000124-13-4        | +                  |                       | +            |                     | 35a (0.48); 69a (0.30); ac3B (0.27)                          |
| 16  | 1070       | 31.05%               | 2.03%          | octanol               | 000111-87-4        | +                  |                       | +            |                     | ac3B (0.68); 35a (0.67); 19a (0.22)                          |
| 17  | 1093       | 7.67%                | 0.50%          | 2-nonanone            | 000821-55-6        | +                  |                       |              |                     |                                                              |
| 18  | 1106       | 42.01%               | 2.74%          | nonanal               | 000124-19-6        | +                  |                       |              |                     |                                                              |
| 19  | 1170       | 10.86%               | 0.71%          | octanoic acid         | 000124-07-2        | +                  |                       |              |                     |                                                              |
| 20  | 1300       | 54.11%               | 3.54%          | tridecane             | 000629-50-5        | +                  |                       |              |                     |                                                              |

**Extended Data Table 4 Impurities found in a synthetic standard of *cis*-vaccenyl acetate (*cVA*) by GCMS analysis of headspace volatiles collected by solid phase microextraction.** Compounds which were also detected in the control (glass vial without a sample) were excluded if they were not found within treatments in substantially higher amounts (> 200%). Shown are measured Kováts retention indices (RI), percent relative to the most abundant compound, and percent relative to (*E*)-2-hexenal in the bombykol sample (Table 1). Only compounds which either elicited a reproducible electrophysiological response, or occurred in amounts greater than 5% relative to the peak area of the main compound were included in the table. The asterisks indicate the volatiles that were mainly responsible for eliciting responses from the *D. melanogaster* antenna. Compounds were tentatively identified by matches with NIST database spectra, and where possible by comparison with authentic standards. Positive GC-EAD responses are indicated. Listed in addition are chemoreceptors reported (DoOR 2.0 database<sup>9</sup>) to respond most strongly to a given compound. The reported response level, ranging from 0 (no response) to 1 (max excitation), is indicated within brackets.

| Nr. | Kováts RI  | area rel. high. peak | area rel. E2H* | name                         | CAS                | library data match | verified by synthetic | EAD response     | responding chemoreceptor unit (response level <sup>9</sup> ) |
|-----|------------|----------------------|----------------|------------------------------|--------------------|--------------------|-----------------------|------------------|--------------------------------------------------------------|
| 1   | 503        | 10.74%               | 6.39%          | acetone                      | 000067-64-1        | +                  |                       |                  |                                                              |
| 2   | 542        | traces               | traces         | methyl acetate               | 000079-20-9        | +                  |                       | +                | 59b (0.74); 42a (0.61); 42b (0.52)                           |
| 3   | 600        | 29.35%               | 17.47%         | hexane                       | 000110-54-3        | +                  | +                     |                  |                                                              |
| 4   | <b>615</b> | <b>4.12%</b>         | <b>2.45%</b>   | <b>ethyl acetate*</b>        | <b>000141-78-6</b> | +                  | +                     | +                | <b>42a (0.72)</b> ; 42b (0.61); 59b (0.58)                   |
| 5   | 618        | 100.00%              | 59.53%         | acetic acid                  | 000064-19-7        | +                  |                       | (+) <sup>§</sup> | Ir64a.DC4 (1.00); ac2 (0.70); Ir75a (0.56)                   |
| 6   | 655        | 10.96%               | 6.52%          | methyl cyclopentane          | 000096-37-7        | +                  |                       |                  |                                                              |
| 7   | 676        | 6.02%                | 3.59%          | cyclohexane                  | 000110-82-7        | +                  |                       |                  |                                                              |
| 8   | 755        | 0.21%                | 0.12%          | unknown                      |                    |                    |                       | +                |                                                              |
| 9   | 802        | 0.76%                | 0.45%          | hexanal                      | 000066-25-1        | +                  | +                     | +                | 85b (0.69); ac3B (0.65); 35a (0.56)                          |
| 10  | 850        | 0.58%                | 0.34%          | ( <i>Z</i> )-2-hexenal       | 016635-54-4        | +                  | +                     | +                |                                                              |
| 11  | <b>854</b> | <b>1.19%</b>         | <b>0.71%</b>   | <b>(<i>E</i>)-2-hexenal*</b> | <b>006728-26-3</b> | +                  | +                     | +                | <b>7a (0.83)</b> ; ac3B (0.066); 35a (0.66)                  |

<sup>§</sup>(+) in brackets because acetic acid coelutes together with several other minor compounds on HP5 columns

**Supplementary Table 1 Mass to charge number of bombykol impurities listed in Extended Data Table 1.** For each compound, the Kováts retention index (RI) and the fifteen most abundant fragments by their mass to charge numbers are given, followed by each fragment's abundance relative to the base peak at 100% abundance.

| nr. | name           | Kováts RI | most abundant fragments |       |       |      |      |      |      |      |      |      |       |       |      |      |       |      |
|-----|----------------|-----------|-------------------------|-------|-------|------|------|------|------|------|------|------|-------|-------|------|------|-------|------|
|     |                |           | 1                       | 2     | 3     | 4    | 5    | 6    | 7    | 8    | 9    | 10   | 11    | 12    | 13   | 14   | 15    |      |
| 1   | butanal        | 606       | m/z                     | 44.1  | 72.1  | 43.2 | 41.2 | 29.2 | 57.1 | 39.1 | 42.1 | 31.1 | 71.1  | 45.1  | 38.1 | 60.1 | 40.2  | 73.1 |
|     |                |           | rel. abund.             | 100.0 | 93.9  | 93.5 | 74.8 | 53.8 | 36.7 | 34.4 | 19.0 | 16.2 | 9.5   | 8.0   | 6.7  | 5.1  | 4.8   | 4.6  |
| 2   | 2-butenal      | 653       | m/z                     | 70.1  | 41.2  | 39.1 | 69.1 | 42.1 | 43.1 | 29.1 | 38.1 | 40.1 | 32.1  | 37.1  | 71.1 | 55.1 | 45.1  | 50.1 |
|     |                |           | rel. abund.             | 100.0 | 73.4  | 56.0 | 47.1 | 15.4 | 11.9 | 10.5 | 10.4 | 9.9  | 8.5   | 6.5   | 5.2  | 3.5  | 3.1   | 2.9  |
| 3   | unknown        | 706       | m/z                     | 43.1  | 81.1  | 55.1 | 77.1 | 29.2 | 41.2 | 71.1 | 74.1 | 57.1 | 73.1  | 56.1  | 45.1 | 96.1 | 84.1  | 39.1 |
|     |                |           | rel. abund.             | 100.0 | 89.2  | 77.4 | 70.9 | 68.6 | 68.0 | 63.3 | 61.4 | 57.3 | 41.5  | 41.4  | 41.1 | 37.5 | 37.3  | 36.8 |
| 4   | (Z)-2-pentenal | 749       | m/z                     | 55.1  | 83.1  | 84.1 | 29.2 | 39.1 | 41.1 | 56.1 | 32.1 | 53.2 | 69.1  | 57.1  | 44.1 | 40.1 | 43.1  | 45.2 |
|     |                |           | rel. abund.             | 100.0 | 87.7  | 87.7 | 51.1 | 42.4 | 33.2 | 29.2 | 26.5 | 19.9 | 15.4  | 11.7  | 10.8 | 10.4 | 10.0  | 9.9  |
| 5   | (E)-2-pentenal | 757       | m/z                     | 55.1  | 83.1  | 84.1 | 39.1 | 41.2 | 29.2 | 53.1 | 56.1 | 69.1 | 50.1  | 51.1  | 57.1 | 40.1 | 38.1  | 66.1 |
|     |                |           | rel. abund.             | 100.0 | 80.5  | 65.4 | 38.1 | 35.8 | 31.6 | 18.6 | 18.1 | 11.4 | 8.3   | 7.9   | 7.0  | 5.9  | 5.8   | 5.0  |
| 6   | 3-hexenal      | 804       | m/z                     | 41.2  | 69.1  | 55.2 | 39.2 | 80.1 | 83.1 | 42.2 | 70.1 | 29.2 | 98.1  | 53.1  | 43.1 | 56.1 | 67.2  | 54.2 |
|     |                |           | rel. abund.             | 100.0 | 62.7  | 34.3 | 30.4 | 20.1 | 17.9 | 17.6 | 17.6 | 13.9 | 11.8  | 11.6  | 10.6 | 7.3  | 7.2   | 5.2  |
| 7   | butanoic acid  | 844       | m/z                     | 60.1  | 73.1  | 42.1 | 41.2 | 45.1 | 43.1 | 39.1 | 55.1 | 29.2 | 71.1  | 88.1  | 61.1 | 87.1 | 38.1  | 69.1 |
|     |                |           | rel. abund.             | 100.0 | 36.7  | 16.6 | 15.6 | 13.1 | 12.9 | 9.7  | 8.1  | 6.5  | 2.6   | 2.6   | 2.4  | 1.9  | 1.9   | 1.8  |
| 8   | (Z)-2-hexenal  | 855       | m/z                     | 83.1  | 55.2  | 69.1 | 41.2 | 39.2 | 42.2 | 70.1 | 29.2 | 56.1 | 97.1  | 57.1  | 43.1 | 79.1 | 53.2  | 98.2 |
|     |                |           | rel. abund.             | 100.0 | 72.1  | 56.4 | 53.3 | 45.2 | 24.0 | 21.4 | 19.6 | 18.0 | 16.7  | 14.9  | 14.8 | 13.8 | 13.3  | 11.8 |
| 9   | (E)-2-hexenal  | 862       | m/z                     | 55.2  | 41.2  | 69.2 | 83.1 | 39.2 | 42.2 | 57.1 | 29.2 | 98.2 | 70.1  | 97.2  | 43.2 | 56.2 | 80.1  | 53.2 |
|     |                |           | rel. abund.             | 100.0 | 96.7  | 96.5 | 94.0 | 69.5 | 53.5 | 49.1 | 32.3 | 30.0 | 28.8  | 21.9  | 18.8 | 18.8 | 18.3  | 16.2 |
| 10  | unknown        | 894       | m/z                     | 71.1  | 41.2  | 60.1 | 55.1 | 29.2 | 73.1 | 43.1 | 39.1 | 56.1 | 57.1  | 107.1 | 42.1 | 72.1 | 101.1 | 44.1 |
|     |                |           | rel. abund.             | 100.0 | 30.5  | 24.7 | 24.4 | 21.1 | 19.9 | 13.6 | 12.5 | 12.4 | 9.5   | 7.9   | 5.6  | 4.5  | 4.4   | 4.3  |
| 11  | unknown        | 902       | m/z                     | 133.1 | 151.1 | 81.1 | 71.1 | 43.1 | 41.2 | 55.1 | 89.1 | 39.1 | 135.1 | 57.1  | 32.1 | 29.1 | 42.2  | 53.1 |
|     |                |           | rel. abund.             | 100.0 | 73.4  | 56.0 | 47.1 | 15.4 | 11.9 | 10.5 | 10.4 | 9.9  | 8.5   | 6.5   | 5.2  | 3.5  | 3.1   | 2.9  |



Supplementary Table 1 (continued)

| nr. | name                         | Kováts RI | most abundant fragments |       |       |      |      |      |      |      |       |       |      |      |       |      |       |       |
|-----|------------------------------|-----------|-------------------------|-------|-------|------|------|------|------|------|-------|-------|------|------|-------|------|-------|-------|
|     |                              |           | 1                       | 2     | 3     | 4    | 5    | 6    | 7    | 8    | 9     | 10    | 11   | 12   | 13    | 14   | 15    |       |
| 12  | <b>(E,E)-2,4-hexadienal</b>  | 913       | <b>m/z</b>              | 81.1  | 96.1  | 67.1 | 39.1 | 53.1 | 41.2 | 95.1 | 65.1  | 40.1  | 82.1 | 66.1 | 51.1  | 68.1 | 38.1  | 63.1  |
|     |                              |           | <i>rel. abund.</i>      | 100.0 | 38.3  | 26.5 | 25.8 | 22.8 | 21.9 | 13.9 | 12.5  | 6.6   | 5.4  | 4.8  | 4.8   | 4.5  | 4.5   | 3.9   |
| 13  | <b>unknown</b>               | 933       | <b>m/z</b>              | 55.1  | 41.1  | 43.1 | 32.1 | 97.2 | 29.2 | 39.2 | 56.1  | 83.1  | 69.1 | 71.1 | 112.1 | 73.1 | 42.2  | 45.1  |
|     |                              |           | <i>rel. abund.</i>      | 100.0 | 78.8  | 49.0 | 47.7 | 40.0 | 40.0 | 38.5 | 30.8  | 26.4  | 24.1 | 23.8 | 21.0  | 18.5 | 17.7  | 17.0  |
| 14  | <b>unknown</b>               | 938       | <b>m/z</b>              | 55.1  | 97.1  | 83.1 | 43.1 | 41.2 | 69.2 | 39.1 | 32.1  | 112.1 | 29.2 | 98.1 | 68.1  | 42.1 | 53.1  | 57.1  |
|     |                              |           | <i>rel. abund.</i>      | 100.0 | 65.9  | 41.1 | 40.8 | 38.3 | 27.7 | 26.9 | 24.7  | 17.1  | 16.6 | 15.5 | 13.9  | 13.8 | 11.5  | 11.4  |
| 15  | <b>(E)-2-heptenal</b>        | 960       | <b>m/z</b>              | 83.1  | 57.1  | 41.1 | 55.1 | 56.1 | 70.1 | 69.1 | 29.2  | 39.1  | 68.1 | 85.1 | 43.1  | 84.1 | 86.2  | 42.2  |
|     |                              |           | <i>rel. abund.</i>      | 100.0 | 91.1  | 81.6 | 75.3 | 51.8 | 45.1 | 44.6 | 42.5  | 41.6  | 39.9 | 34.3 | 34.3  | 23.6 | 22.7  | 21.8  |
| 16  | <b>4-octanol</b>             | 991       | <b>m/z</b>              | 69.1  | 55.1  | 73.1 | 87.2 | 41.2 | 43.2 | 57.1 | 29.2  | 45.1  | 70.2 | 44.1 | 39.2  | 72.1 | 31.1  | 56.1  |
|     |                              |           | <i>rel. abund.</i>      | 100.0 | 82.9  | 77.9 | 52.6 | 31.9 | 30.5 | 16.3 | 11.9  | 9.5   | 8.9  | 8.1  | 7.7   | 7.5  | 7.5   | 6.6   |
| 17  | <b>(E,E)-2,4-heptadienal</b> | 1013      | <b>m/z</b>              | 81.1  | 110.1 | 53.1 | 39.2 | 41.2 | 79.1 | 67.2 | 68.1  | 82.1  | 77.1 | 55.1 | 65.1  | 51.1 | 95.1  | 29.1  |
|     |                              |           | <i>rel. abund.</i>      | 100.0 | 17.9  | 15.9 | 13.7 | 13.4 | 11.3 | 10.2 | 8.3   | 7.0   | 6.2  | 6.1  | 5.9   | 4.9  | 4.6   | 4.3   |
| 18  | <b>unknown</b>               | 1040      | <b>m/z</b>              | 83.1  | 85.1  | 55.1 | 84.1 | 57.1 | 29.2 | 67.1 | 112.1 | 41.2  | 43.1 | 39.1 | 54.1  | 56.1 | 53.1  | 86.1  |
|     |                              |           | <i>rel. abund.</i>      | 100.0 | 42.1  | 25.6 | 24.1 | 16.3 | 9.6  | 8.8  | 7.9   | 7.5   | 7.2  | 5.4  | 4.5   | 3.6  | 2.7   | 2.2   |
| 19  | <b>unknown</b>               | 1172      | <b>m/z</b>              | 67.2  | 81.2  | 95.2 | 55.2 | 41.2 | 54.2 | 82.2 | 68.2  | 96.2  | 57.1 | 69.2 | 39.2  | 79.1 | 53.2  | 124.2 |
|     |                              |           | <i>rel. abund.</i>      | 100.0 | 90.9  | 71.1 | 65.8 | 57.3 | 56.2 | 55.3 | 52.1  | 42.2  | 26.7 | 22.0 | 21.4  | 16.0 | 15.6  | 15.1  |
| 20  | <b>nonanol</b>               | 1174      | <b>m/z</b>              | 56.2  | 55.2  | 70.2 | 69.2 | 41.2 | 43.2 | 83.2 | 97.2  | 98.2  | 57.2 | 84.2 | 42.2  | 68.2 | 29.2  | 31.2  |
|     |                              |           | <i>rel. abund.</i>      | 100.0 | 91.8  | 88.8 | 77.7 | 66.2 | 58.3 | 48.3 | 40.0  | 36.7  | 35.7 | 33.0 | 29.1  | 27.0 | 19.9  | 17.3  |
| 21  | <b>unknown</b>               | 1259      | <b>m/z</b>              | 55.2  | 69.2  | 83.2 | 70.2 | 56.2 | 41.2 | 57.2 | 97.2  | 182.3 | 43.2 | 84.2 | 67.2  | 71.2 | 111.2 | 98.2  |
|     |                              |           | <i>rel. abund.</i>      | 100.0 | 84.4  | 68.0 | 65.7 | 62.3 | 61.6 | 49.7 | 47.6  | 42.5  | 39.5 | 36.3 | 20.6  | 20.5 | 20.5  | 18.0  |
| 22  | <b>unknown</b>               | 1309      | <b>m/z</b>              | 67.1  | 55.2  | 81.1 | 97.1 | 79.1 | 84.1 | 95.1 | 69.1  | 41.2  | 54.1 | 43.2 | 93.1  | 68.1 | 83.1  | 82.2  |
|     |                              |           | <i>rel. abund.</i>      | 100.0 | 98.1  | 91.1 | 78.7 | 75.7 | 71.4 | 71.0 | 70.7  | 69.6  | 57.6 | 56.3 | 47.7  | 41.0 | 40.7  | 39.0  |

**Supplementary Table 2 Mass to charge ratios of ions from linoleic acid impurities listed in Extended Data Table 2.** For each compound, the Kováts retention index (RI) and the fifteen most abundant fragments by their mass to charge numbers are given, followed by each fragment's abundance relative to the base peak at 100% abundance.

| nr. | name                       | Kováts RI | most abundant fragments |       |      |      |      |      |      |       |      |      |       |      |       |       |       |       |
|-----|----------------------------|-----------|-------------------------|-------|------|------|------|------|------|-------|------|------|-------|------|-------|-------|-------|-------|
|     |                            |           | 1                       | 2     | 3    | 4    | 5    | 6    | 7    | 8     | 9    | 10   | 11    | 12   | 13    | 14    | 15    |       |
| 1   | <b>2-methylpropanal</b>    | 556       | <b>m/z</b>              | 43.2  | 42.2 | 41.2 | 32.1 | 57.2 | 39.2 | 72.2  | 55.2 | 40.1 | 56.2  | 58.2 | 53.1  | 38.2  | 47.1  | 51.1  |
|     |                            |           | <i>rel. abund.</i>      | 100.0 | 56.9 | 55.2 | 36.6 | 19.3 | 19.0 | 16.2  | 7.6  | 7.0  | 6.0   | 3.3  | 2.5   | 2.3   | 1.9   | 1.7   |
| 2   | <b>heptane</b>             | 700       | <b>m/z</b>              | 43.2  | 41.2 | 57.1 | 71.2 | 29.2 | 56.2 | 39.2  | 42.2 | 70.2 | 77.1  | 55.1 | 100.2 | 45.1  | 78.1  | 86.1  |
|     |                            |           | <i>rel. abund.</i>      | 100.0 | 84.1 | 81.6 | 57.8 | 57.0 | 33.2 | 30.3  | 30.1 | 26.9 | 25.0  | 21.3 | 19.9  | 17.4  | 4.9   | 4.1   |
| 3   | <b>2-pentenal (traces)</b> | 752       | <b>m/z</b>              | 55.1  | 83.1 | 84.1 | 41.2 | 29.2 | 56.2 | 39.1  | 67.1 | 57.1 | 53.1  | 44.0 | 96.1  | 54.1  | 77.1  | 69.1  |
|     |                            |           | <i>rel. abund.</i>      | 100.0 | 67.5 | 64.8 | 58.0 | 49.4 | 43.8 | 43.2  | 38.5 | 30.1 | 29.6  | 27.2 | 24.1  | 23.1  | 22.0  | 21.6  |
| 4   | <b>hexanal</b>             | 806       | <b>m/z</b>              | 56.2  | 41.2 | 44.2 | 57.2 | 43.2 | 29.2 | 39.2  | 72.1 | 82.1 | 55.2  | 71.2 | 67.2  | 42.2  | 45.2  | 58.1  |
|     |                            |           | <i>rel. abund.</i>      | 100.0 | 84.8 | 84.6 | 75.9 | 68.3 | 35.3 | 35.2  | 33.8 | 29.6 | 27.1  | 19.3 | 19.0  | 18.2  | 17.8  | 11.5  |
| 5   | <b>(Z)-2-hexenal</b>       | 855       | <b>m/z</b>              | 41.2  | 69.1 | 55.1 | 83.1 | 42.2 | 57.1 | 39.2  | 29.2 | 98.1 | 70.1  | 43.1 | 56.1  | 97.1  | 112.0 | 80.1  |
|     |                            |           | <i>rel. abund.</i>      | 100.0 | 99.4 | 95.7 | 86.8 | 59.7 | 59.5 | 58.7  | 36.0 | 31.6 | 28.8  | 26.1 | 23.7  | 21.1  | 17.7  | 17.2  |
| 6   | <b>(E)-2-hexenal</b>       | 856       | <b>m/z</b>              | 41.2  | 69.1 | 55.1 | 83.1 | 39.2 | 57.1 | 42.2  | 29.2 | 98.1 | 70.1  | 43.2 | 56.1  | 97.1  | 80.1  | 53.2  |
|     |                            |           | <i>rel. abund.</i>      | 100.0 | 97.1 | 94.3 | 87.4 | 60.5 | 58.7 | 57.4  | 36.9 | 32.6 | 28.3  | 27.7 | 24.1  | 21.6  | 17.0  | 14.7  |
| 7   | <b>hexanol</b>             | 870       | <b>m/z</b>              | 56.2  | 55.2 | 43.2 | 41.2 | 69.1 | 42.2 | 31.2  | 29.2 | 39.2 | 57.1  | 91.1 | 84.1  | 44.1  | 70.2  | 53.1  |
|     |                            |           | <i>rel. abund.</i>      | 100.0 | 50.6 | 48.9 | 35.8 | 35.7 | 33.1 | 16.5  | 14.3 | 10.9 | 10.3  | 6.5  | 6.1   | 4.1   | 3.4   | 2.9   |
| 8   | <b>2-heptanone</b>         | 894       | <b>m/z</b>              | 43.2  | 58.1 | 71.1 | 81.1 | 41.2 | 59.1 | 114.1 | 99.1 | 39.2 | 55.2  | 29.2 | 42.2  | 72.1  | 85.1  | 124.1 |
|     |                            |           | <i>rel. abund.</i>      | 100.0 | 77.8 | 24.5 | 16.2 | 12.9 | 12.8 | 9.1   | 8.3  | 8.0  | 7.4   | 6.9  | 6.0   | 4.5   | 4.3   | 3.8   |
| 9   | <b>heptanal</b>            | 904       | <b>m/z</b>              | 43.2  | 55.2 | 41.2 | 70.1 | 57.1 | 44.1 | 81.1  | 71.1 | 29.2 | 133.0 | 42.2 | 39.2  | 151.0 | 99.1  | 68.1  |
|     |                            |           | <i>rel. abund.</i>      | 100.0 | 81.1 | 74.9 | 72.9 | 61.1 | 47.2 | 45.4  | 40.9 | 35.6 | 35.6  | 35.4 | 28.2  | 26.8  | 21.8  | 21.0  |
| 10  | <b>unknown</b>             | 908       | <b>m/z</b>              | 71.1  | 41.2 | 55.2 | 56.2 | 43.2 | 58.1 | 42.2  | 57.1 | 29.2 | 39.2  | 70.1 | 67.1  | 85.1  | 44.1  | 69.1  |
|     |                            |           | <i>rel. abund.</i>      | 100.0 | 55.4 | 45.8 | 38.1 | 34.4 | 33.6 | 26.0  | 23.1 | 22.2 | 18.8  | 18.0 | 16.0  | 15.0  | 14.4  | 13.1  |
| 11  | <b>unknown</b>             | 929       | <b>m/z</b>              | 56.1  | 55.2 | 41.2 | 43.1 | 69.1 | 42.2 | 67.1  | 54.1 | 29.2 | 57.1  | 39.2 | 68.1  | 133.0 | 124.1 | 83.1  |
|     |                            |           | <i>rel. abund.</i>      | 100.0 | 99.4 | 95.7 | 86.8 | 59.7 | 59.5 | 58.7  | 36.0 | 31.6 | 28.8  | 26.1 | 23.7  | 21.1  | 17.7  | 17.2  |

Supplementary Table 2 (continued)

| nr. | name                  | Kováts RI | most abundant fragments |       |       |      |      |      |      |      |      |      |      |      |      |       |      |      |
|-----|-----------------------|-----------|-------------------------|-------|-------|------|------|------|------|------|------|------|------|------|------|-------|------|------|
|     |                       |           | 1                       | 2     | 3     | 4    | 5    | 6    | 7    | 8    | 9    | 10   | 11   | 12   | 13   | 14    | 15   |      |
| 12  | <b>(Z)-2-heptenal</b> | 948       | m/z                     | 83.1  | 55.1  | 70.1 | 41.2 | 69.1 | 39.2 | 84.1 | 57.1 | 43.2 | 68.1 | 29.2 | 42.2 | 56.1  | 53.2 | 79.1 |
|     |                       |           | rel. abund.             | 100.0 | 38.5  | 32.4 | 31.1 | 21.2 | 20.0 | 14.7 | 13.0 | 12.6 | 12.1 | 11.6 | 9.9  | 9.5   | 8.5  | 6.5  |
| 13  | <b>(E)-2-heptenal</b> | 960       | m/z                     | 83.1  | 41.2  | 55.2 | 57.1 | 56.2 | 70.1 | 69.1 | 68.1 | 39.2 | 43.2 | 84.1 | 29.2 | 42.2  | 97.1 | 53.1 |
|     |                       |           | rel. abund.             | 100.0 | 73.4  | 69.4 | 55.4 | 46.9 | 45.3 | 42.3 | 39.1 | 38.1 | 26.8 | 22.4 | 19.1 | 17.4  | 14.1 | 12.8 |
| 14  | <b>1-octen-3-ol</b>   | 981       | m/z                     | 57.1  | 43.2  | 72.1 | 55.1 | 41.2 | 29.2 | 85.1 | 60.1 | 70.1 | 73.1 | 58.1 | 39.2 | 71.1  | 99.1 | 68.1 |
|     |                       |           | rel. abund.             | 100.0 | 19.8  | 18.5 | 18.0 | 13.4 | 11.9 | 10.5 | 10.4 | 8.9  | 7.9  | 6.8  | 6.7  | 6.5   | 6.5  | 5.7  |
| 15  | <b>unknown</b>        | 989       | m/z                     | 60.1  | 73.1  | 43.2 | 41.2 | 57.1 | 87.1 | 55.1 | 45.1 | 29.2 | 99.1 | 42.2 | 72.1 | 39.2  | 61.1 | 71.1 |
|     |                       |           | rel. abund.             | 100.0 | 54.7  | 30.6 | 23.5 | 23.0 | 17.5 | 16.0 | 12.7 | 12.1 | 11.9 | 11.1 | 10.9 | 10.6  | 10.1 | 9.3  |
| 16  | <b>2-pentyl furan</b> | 994       | m/z                     | 81.1  | 138.1 | 82.1 | 53.1 | 60.1 | 95.1 | 41.2 | 94.1 | 39.2 | 73.1 | 67.1 | 83.1 | 109.1 | 29.2 | 43.2 |
|     |                       |           | rel. abund.             | 100.0 | 24.3  | 24.2 | 10.2 | 7.5  | 5.7  | 5.6  | 4.7  | 4.4  | 4.4  | 3.2  | 3.0  | 2.7   | 2.7  | 2.7  |
| 17  | <b>octanal</b>        | 1005      | m/z                     | 43.2  | 57.1  | 41.2 | 84.2 | 56.2 | 44.1 | 55.2 | 69.2 | 29.2 | 81.1 | 42.2 | 82.1 | 68.1  | 67.1 | 85.2 |
|     |                       |           | rel. abund.             | 100.0 | 91.8  | 88.3 | 85.9 | 83.9 | 77.3 | 74.4 | 51.2 | 44.3 | 42.5 | 41.7 | 40.5 | 36.7  | 32.8 | 32.0 |
| 18  | <b>2-octenal</b>      | 1062      | m/z                     | 70.1  | 55.2  | 83.1 | 41.2 | 57.1 | 69.1 | 82.1 | 39.2 | 29.2 | 42.2 | 67.1 | 97.1 | 84.1  | 56.2 | 68.1 |
|     |                       |           | rel. abund.             | 100.0 | 83.0  | 75.3 | 70.2 | 53.5 | 47.8 | 40.1 | 36.7 | 34.8 | 28.5 | 24.9 | 21.2 | 20.3  | 16.3 | 15.9 |

**Supplementary Table 3 Mass to charge ratios of ions from (Z)-9-tricosene impurities listed in Extended Data Table 3.** For each compound, the Kováts retention index (RI) and the fifteen most abundant fragments by their mass to charge numbers are given, followed by each fragment's abundance relative to the base peak at 100% abundance.

| nr. | name                       | Kováts RI | most abundant fragments |       |      |      |      |      |      |      |      |       |      |      |       |      |       |       |
|-----|----------------------------|-----------|-------------------------|-------|------|------|------|------|------|------|------|-------|------|------|-------|------|-------|-------|
|     |                            |           | 1                       | 2     | 3    | 4    | 5    | 6    | 7    | 8    | 9    | 10    | 11   | 12   | 13    | 14   | 15    |       |
| 1   | unknown                    | 574       | m/z                     | 44.1  | 40.1 | 43.1 | 29.2 | 45.1 | 60.1 | 59.2 | 42.1 | 41.2  | 58.2 | 75.1 | 207.0 | 34.1 | 39.2  | 57.2  |
|     |                            |           | rel. abund.             | 100.0 | 98.1 | 57.4 | 45.4 | 42.2 | 30.6 | 30.4 | 9.8  | 8.7   | 7.8  | 6.6  | 6.1   | 4.9  | 4.2   | 4.2   |
| 2   | acetic acid                | 612       | m/z                     | 43.2  | 32.1 | 45.1 | 57.2 | 60.1 | 41.2 | 29.2 | 42.2 | 59.1  | 56.2 | 44.1 | 39.2  | 75.1 | 31.2  | 86.2  |
|     |                            |           | rel. abund.             | 100.0 | 58.6 | 56.9 | 40.6 | 40.2 | 37.9 | 27.3 | 26.9 | 23.9  | 21.1 | 18.1 | 12.2  | 10.1 | 8.7   | 8.0   |
| 3   | unknown                    | 678       | m/z                     | 77.1  | 45.1 | 43.2 | 56.2 | 84.1 | 78.1 | 41.2 | 74.1 | 207.0 | 55.1 | 42.2 | 29.2  | 79.1 | 57.1  | 73.1  |
|     |                            |           | rel. abund.             | 100.0 | 16.8 | 13.4 | 10.8 | 7.9  | 7.8  | 7.5  | 5.5  | 5.0   | 4.8  | 4.5  | 4.5   | 4.4  | 3.5   | 3.4   |
| 4   | heptane                    | 700       | m/z                     | 77.1  | 45.1 | 43.2 | 56.2 | 84.1 | 78.1 | 41.2 | 74.1 | 207.0 | 55.1 | 42.2 | 29.2  | 79.1 | 57.1  | 73.1  |
|     |                            |           | rel. abund.             | 100.0 | 16.8 | 13.4 | 10.8 | 7.9  | 7.8  | 7.5  | 5.5  | 5.0   | 4.8  | 4.5  | 4.5   | 4.4  | 3.5   | 3.4   |
| 5   | unknown                    | 774       | m/z                     | 43.2  | 41.2 | 57.1 | 44.2 | 56.2 | 71.2 | 29.2 | 45.1 | 55.2  | 70.2 | 42.2 | 58.1  | 39.2 | 100.2 | 207.0 |
|     |                            |           | rel. abund.             | 100.0 | 80.5 | 70.9 | 69.5 | 57.7 | 53.1 | 51.7 | 36.1 | 36.1  | 34.9 | 34.5 | 32.2  | 31.4 | 16.5  | 16.1  |
| 6   | hexanal                    | 806       | m/z                     | 91.1  | 60.1 | 92.1 | 41.2 | 55.2 | 42.2 | 70.2 | 73.1 | 43.1  | 39.2 | 29.2 | 45.2  | 69.1 | 57.1  | 31.2  |
|     |                            |           | rel. abund.             | 100.0 | 92.8 | 58.3 | 51.7 | 51.4 | 50.4 | 37.5 | 32.0 | 31.3  | 23.4 | 21.5 | 21.0  | 18.3 | 17.3  | 15.0  |
| 7   | (Z)-2-hexenal <sup>§</sup> | 850       | m/z                     | 69.1  | 83.1 | 41.2 | 55.1 | 97.1 | 29.2 | 98.1 |      |       |      |      |       |      |       |       |
|     |                            |           | rel. abund.             | 100.0 | 93.2 | 78.1 | 76.6 | 44.4 | 25.8 | 6.0  |      |       |      |      |       |      |       |       |
| 8   | (E)-2-hexenal <sup>§</sup> | 858       | m/z                     | 41.2  | 55.1 | 69.1 | 83.1 | 29.2 | 98.1 | 97.1 |      |       |      |      |       |      |       |       |
|     |                            |           | rel. abund.             | 100.0 | 82.0 | 70.3 | 49.3 | 44.2 | 34.4 | 24.7 |      |       |      |      |       |      |       |       |
| 9   | hexanol                    | 867       | m/z                     | 56.2  | 55.2 | 43.2 | 41.2 | 69.1 | 42.2 | 31.2 | 29.2 | 39.2  | 57.2 | 84.1 | 71.1  | 70.2 | 44.1  | 91.1  |
|     |                            |           | rel. abund.             | 100.0 | 56.2 | 49.6 | 38.7 | 35.9 | 31.1 | 16.4 | 13.2 | 12.0  | 10.9 | 7.6  | 5.8   | 4.9  | 4.8   | 3.9   |
| 10  | 2-heptanone                | 890       | m/z                     | 43.2  | 58.1 | 56.2 | 41.2 | 55.2 | 70.1 | 71.1 | 39.2 | 42.1  | 29.2 | 97.1 | 114.1 | 98.1 | 44.1  | 54.2  |
|     |                            |           | rel. abund.             | 100.0 | 55.6 | 39.8 | 39.2 | 36.0 | 21.9 | 20.1 | 18.6 | 16.0  | 15.1 | 12.3 | 7.7   | 6.6  | 4.7   | 4.6   |

<sup>§</sup> Ion fragment values by SIM (Selected Ion Monitoring)

Supplementary Table 3 (continued)

| nr. | name           | Kováts RI | most abundant fragments |       |      |      |       |      |       |       |      |      |      |       |      |      |      |       |
|-----|----------------|-----------|-------------------------|-------|------|------|-------|------|-------|-------|------|------|------|-------|------|------|------|-------|
|     |                |           | 1                       | 2     | 3    | 4    | 5     | 6    | 7     | 8     | 9    | 10   | 11   | 12    | 13   | 14   | 15   |       |
| 11  | heptanal       | 901       | m/z                     | 70.2  | 44.2 | 43.2 | 41.2  | 55.2 | 57.1  | 42.2  | 71.1 | 29.2 | 81.1 | 39.2  | 86.1 | 68.1 | 96.1 | 45.2  |
|     |                |           | rel. abund.             | 100.0 | 72.4 | 63.5 | 58.6  | 56.8 | 50.3  | 39.3  | 30.8 | 30.5 | 28.7 | 22.1  | 22.0 | 19.5 | 16.3 | 15.9  |
| 12  | (E)-2-heptenal | 956       | m/z                     | 56.1  | 83.1 | 41.2 | 55.1  | 57.1 | 43.1  | 69.1  | 68.1 | 70.2 | 39.1 | 29.2  | 85.1 | 42.2 | 91.1 | 32.1  |
|     |                |           | rel. abund.             | 100.0 | 99.1 | 98.0 | 91.5  | 73.6 | 70.0  | 52.1  | 50.0 | 48.5 | 46.5 | 41.4  | 34.7 | 31.2 | 23.7 | 19.8  |
| 13  | heptanol       | 968       | m/z                     | 70.2  | 56.2 | 55.2 | 69.2  | 41.2 | 43.2  | 42.2  | 57.2 | 29.2 | 31.2 | 68.2  | 39.2 | 83.2 | 71.1 | 54.2  |
|     |                |           | rel. abund.             | 100.0 | 78.9 | 62.0 | 52.5  | 50.0 | 45.5  | 32.1  | 20.3 | 15.5 | 15.4 | 14.8  | 11.9 | 9.5  | 6.1  | 4.9   |
| 14  | unknown        | 980       | m/z                     | 83.1  | 41.1 | 55.1 | 39.2  | 43.2 | 133.0 | 103.1 | 94.1 | 59.1 | 60.1 | 87.1  | 70.1 | 45.1 | 75.1 | 113.1 |
|     |                |           | rel. abund.             | 100.0 | 48.7 | 47.0 | 31.9  | 24.6 | 23.1  | 21.5  | 21.1 | 19.9 | 19.1 | 19.0  | 18.8 | 18.6 | 17.8 | 17.4  |
| 15  | octanal        | 1004      | m/z                     | 43.2  | 57.2 | 84.2 | 41.2  | 56.2 | 44.1  | 55.2  | 69.1 | 29.2 | 81.1 | 82.1  | 42.2 | 68.1 | 67.1 | 85.2  |
|     |                |           | rel. abund.             | 100.0 | 94.6 | 92.1 | 89.2  | 88.7 | 79.7  | 74.1  | 51.6 | 44.8 | 42.7 | 42.5  | 42.2 | 39.7 | 34.5 | 32.4  |
| 16  | octanol        | 1070      | m/z                     | 56.2  | 55.2 | 70.1 | 69.2  | 41.2 | 84.2  | 43.2  | 83.2 | 42.2 | 57.2 | 60.1  | 68.1 | 29.2 | 73.1 | 39.2  |
|     |                |           | rel. abund.             | 100.0 | 90.8 | 75.5 | 74.7  | 72.0 | 59.0  | 57.8  | 53.8 | 42.6 | 37.9 | 28.6  | 23.5 | 23.4 | 20.7 | 18.3  |
| 17  | 2-nonanone     | 1093      | m/z                     | 58.1  | 43.1 | 71.1 | 57.2  | 59.2 | 41.2  | 142.2 | 55.2 | 85.1 | 29.2 | 39.2  | 84.1 | 42.2 | 82.1 | 56.2  |
|     |                |           | rel. abund.             | 100.0 | 71.1 | 25.1 | 22.1  | 22.0 | 15.6  | 10.4  | 9.0  | 6.3  | 6.1  | 5.8   | 5.3  | 5.0  | 4.9  | 4.3   |
| 18  | nonanal        | 1106      | m/z                     | 57.2  | 41.2 | 56.2 | 43.2  | 55.2 | 98.2  | 44.1  | 70.2 | 82.1 | 69.2 | 68.2  | 81.1 | 95.1 | 29.2 | 96.1  |
|     |                |           | rel. abund.             | 100.0 | 62.1 | 58.9 | 51.8  | 49.4 | 43.4  | 43.1  | 41.6 | 37.1 | 35.7 | 32.7  | 29.5 | 29.0 | 28.5 | 27.5  |
| 19  | octanoic acid  | 1170      | m/z                     | 60.1  | 73.1 | 43.2 | 101.1 | 55.2 | 41.2  | 85.2  | 84.1 | 87.1 | 69.2 | 115.1 | 61.1 | 29.2 | 57.2 | 45.1  |
|     |                |           | rel. abund.             | 100.0 | 78.1 | 35.1 | 31.2  | 27.7 | 27.3  | 22.0  | 21.2 | 15.7 | 13.8 | 13.1  | 12.6 | 11.9 | 10.1 | 9.9   |
| 20  | tridecane      | 1300      | m/z                     | 57.2  | 71.2 | 43.2 | 85.2  | 41.2 | 55.2  | 56.2  | 70.2 | 29.2 | 99.2 | 184.2 | 84.2 | 42.2 | 69.2 | 98.2  |
|     |                |           | rel. abund.             | 100.0 | 69.6 | 62.1 | 47.1  | 28.0 | 15.5  | 15.4  | 13.8 | 10.6 | 9.4  | 8.8   | 8.8  | 8.2  | 7.6  | 7.5   |

**Supplementary Table 4** Mass to charge ratios of ions from *cVA* impurities listed in Extended Data Table 4. For each compound, the Kováts retention index (RI) and the fifteen most abundant fragments by their mass to charge numbers are given, followed by each fragment's abundance relative to the base peak at 100% abundance.

| nr. | name                | Kováts RI | most abundant fragments |       |      |      |      |      |      |      |      |      |      |      |      |      |      |      |
|-----|---------------------|-----------|-------------------------|-------|------|------|------|------|------|------|------|------|------|------|------|------|------|------|
|     |                     |           | 1                       | 2     | 3    | 4    | 5    | 6    | 7    | 8    | 9    | 10   | 11   | 12   | 13   | 14   | 15   |      |
| 1   | methyl acetate      | 542       | m/z                     | 43.1  | 74.1 | 32.1 | 59.1 | 42.1 | 29.1 | 44.1 | 31.1 | 84.0 | 45.1 | 41.1 | 40.0 | 75.0 | 86.0 | 49.1 |
|     |                     |           | rel. abund.             | 100.0 | 28.0 | 12.0 | 9.5  | 9.4  | 4.6  | 3.6  | 2.1  | 1.9  | 1.7  | 1.6  | 1.5  | 1.2  | 1.2  | 0.9  |
| 2   | hexane              | 600       | m/z                     | 57.2  | 43.2 | 41.2 | 29.2 | 27.1 | 56.2 | 42.2 | 39.2 | 86.1 | 28.1 | 55.2 | 15.0 | 71.2 | 58.1 | 26.1 |
|     |                     |           | rel. abund.             | 100.0 | 81.3 | 70.2 | 60.7 | 45.4 | 45.3 | 40.9 | 19.7 | 15.5 | 10.7 | 6.6  | 5.8  | 5.0  | 4.4  | 3.9  |
| 3   | ethyl acetate       | 615       | m/z                     | 43.1  | 45.1 | 60.1 | 15.1 | 42.1 | 29.1 | 14.1 | 28.2 | 41.1 | 18.1 | 44.1 | 31.2 | 16.1 | 13.1 | 61.1 |
|     |                     |           | rel. abund.             | 100.0 | 90.4 | 74.8 | 17.0 | 13.0 | 8.4  | 4.8  | 4.0  | 3.5  | 2.7  | 2.4  | 2.4  | 2.3  | 2.0  | 1.9  |
| 4   | acetic acid         | 618       | m/z                     | 43.1  | 45.1 | 60.1 | 15.1 | 42.1 | 14.1 | 29.1 | 28.2 | 13.1 | 16.1 | 18.1 | 44.1 | 41.1 | 31.1 | 17.1 |
|     |                     |           | rel. abund.             | 100.0 | 87.5 | 57.1 | 41.6 | 13.7 | 13.3 | 13.2 | 7.3  | 6.4  | 6.4  | 5.6  | 4.7  | 4.4  | 3.6  | 2.8  |
| 5   | methyl cyclopentane | 655       | m/z                     | 56.2  | 41.2 | 69.1 | 42.2 | 55.2 | 84.2 | 39.2 | 43.2 | 27.1 | 29.2 | 57.2 | 68.1 | 40.2 | 54.2 | 53.1 |
|     |                     |           | rel. abund.             | 100.0 | 49.4 | 35.3 | 24.6 | 23.0 | 17.4 | 13.9 | 11.1 | 9.9  | 7.1  | 6.0  | 4.0  | 3.5  | 3.1  | 2.7  |
| 6   | cyclohexane         | 676       | m/z                     | 56.1  | 84.1 | 41.2 | 55.2 | 69.1 | 42.1 | 43.1 | 39.2 | 57.2 | 27.1 | 85.1 | 29.2 | 28.1 | 83.1 | 54.2 |
|     |                     |           | rel. abund.             | 100.0 | 71.4 | 50.5 | 30.9 | 25.8 | 25.0 | 23.0 | 14.9 | 14.0 | 11.6 | 8.5  | 8.4  | 6.1  | 4.8  | 4.8  |
| 7   | unknown             | 755       | m/z                     | 44.1  | 55.1 | 83.1 | 45.2 | 41.2 | 71.1 | 75.1 | 84.1 | 29.2 | 39.2 | 43.2 | 32.1 | 46.1 | 77.1 | 69.1 |
|     |                     |           | rel. abund.             | 100.0 | 74.3 | 55.9 | 55.6 | 54.9 | 51.4 | 50.0 | 43.4 | 43.3 | 37.6 | 33.3 | 28.4 | 26.9 | 26.6 | 22.3 |
| 8   | hexanal             | 802       | m/z                     | 44.1  | 56.2 | 41.2 | 43.1 | 57.1 | 27.1 | 29.2 | 39.1 | 45.1 | 72.1 | 55.1 | 82.1 | 42.1 | 58.1 | 67.1 |
|     |                     |           | rel. abund.             | 100.0 | 82.0 | 69.1 | 55.1 | 38.0 | 33.8 | 32.9 | 20.0 | 19.4 | 16.6 | 15.2 | 12.7 | 10.7 | 8.9  | 8.0  |
| 9   | (Z)-2-hexenal       | 850       | m/z                     | 83.1  | 55.2 | 69.1 | 41.2 | 39.2 | 42.2 | 70.1 | 29.2 | 56.1 | 97.1 | 57.1 | 43.1 | 79.1 | 53.2 | 98.2 |
|     |                     |           | rel. abund.             | 100.0 | 72.1 | 56.4 | 53.3 | 45.2 | 24.0 | 21.4 | 19.6 | 18.0 | 16.7 | 14.9 | 14.8 | 13.8 | 13.3 | 11.8 |
| 10  | (E)-2-hexenal       | 854       | m/z                     | 41.2  | 55.1 | 42.2 | 69.1 | 39.2 | 83.1 | 57.1 | 27.1 | 29.2 | 98.1 | 43.1 | 70.2 | 56.2 | 53.2 | 80.1 |
|     |                     |           | rel. abund.             | 100.0 | 61.1 | 58.1 | 57.1 | 50.1 | 48.0 | 47.0 | 43.0 | 42.0 | 26.0 | 23.0 | 17.0 | 14.0 | 9.8  | 9.6  |

**Supplementary Table 5 Calculated vapour pressure** in Pascals for selected compounds of particular importance in the present study (see tables 1-3), arranged by their molecular weights. The vapour pressure values are calculated estimates based either on experimental data provided in literature (method 1) or estimates calculated with the EPI Suite™ software (U.S. Environmental Protection Agency, v4.11, June 2017; method 2 = mean values of Antoine and Grain methods; method 3 = values by the modified Grain method).

| CAS         | name                  | IUPAC name                         | molecular weight | vapour pressure (Pa) | calculation method |
|-------------|-----------------------|------------------------------------|------------------|----------------------|--------------------|
| 000064-19-7 | acetic acid           | acetic acid                        | 60.05            | 1.12E+03             | 1                  |
| 000123-72-8 | butanal               | butanal                            | 72.11            | 1.43E+04             | 1                  |
| 000078-84-2 | 2-methylpropanal      | 2-methylpropanal                   | 72.11            | 2.21E+04             | 1                  |
| 000079-20-9 | methyl acetate        | methyl acetate                     | 74.08            | 2.90E+04             | 1                  |
| 001576-87-0 | (E)-2-pentenal        | (E)-2-pentenal                     | 84.12            | 1.69E+03             | 1                  |
| 000141-78-6 | ethyl acetate         | ethyl acetate                      | 88.11            | 1.28E+04             | 1                  |
| 000142-83-6 | (E,E)-2,4-hexadienal  | (E,E)-2,4-hexadienal               | 96.13            | 1.72E+02             | 2                  |
| 006728-26-3 | (E)-2-hexenal         | (E)-2-hexenal                      | 98.15            | 6.29E+02             | 2                  |
| 016635-54-4 | (Z)-2-hexenal         | (Z)-2-hexenal                      | 98.15            | 6.29E+02             | 2                  |
| 004440-65-7 | 3-hexenal             | 3-hexenal                          | 98.15            | 1.38E+03             | 2                  |
| 000066-25-1 | hexanal               | hexanal                            | 100.16           | 1.41E+03             | 2                  |
| 000111-27-3 | hexanol               | hexanol                            | 102.18           | 1.17E+02             | 2                  |
| 004313-03-5 | (E,E)-2,4-heptadienal | (E,E)-2,4-heptadienal              | 110.16           | 5.66E+01             | 3                  |
| 018829-55-5 | (E)-2-heptenal        | (E)-2-heptenal                     | 112.17           | 2.52E+02             | 2                  |
| 000111-71-7 | heptanal              | heptanal                           | 114.19           | 4.69E+02             | 2                  |
| 000110-43-0 | 2-heptanone           | 2-heptanone                        | 114.19           | 6.55E+02             | 2                  |
| 000111-70-6 | heptanol              | heptanol                           | 116.21           | 3.98E+01             | 2                  |
| 003391-86-4 | 1-octen-3-ol          | 1-octen-3-ol                       | 128.22           | 3.17E+01             | 2                  |
| 000124-13-0 | octanal               | octanal                            | 128.22           | 1.99E+02             | 2                  |
| 000111-87-5 | octanol               | octanol                            | 130.23           | 1.32E+01             | 2                  |
| 000589-62-8 | 4-octanol             | 4-octanol                          | 130.23           | 4.01E+01             | 2                  |
| 063024-98-6 | bombykal              | (10E,12Z)-10,12-hexadecadien-1-al  | 236.4            | 5.49E-02             | 3                  |
| 000765-17-3 | bombykol              | (10E,12Z)-10,12-hexadecadien-1-ol  | 238.42           | 7.59E-04             | 3                  |
| 000060-33-3 | linoleic acid         | (9Z,12Z)-9,12-octadecadienoic acid | 280.45           | 2.03E-03             | 3                  |
| 006186-98-7 | cis- vaccenyl acetate | (Z)- 11-octadecenyl acetate        | 310.52           | 1.96E-03             | 3                  |
| 027519-02-4 | (Z)-9-tricosene       | (Z)-9-tricosene                    | 322.62           | 8.45E-03             | 3                  |
